# Supplementary material for: Retrogressive thaw slumps temper dissolved organic carbon delivery to streams of the Peel Plateau, NWT, Canada
Source: Copernicus journal article supplement (doi:10.5194/bg-2017-217), 2017-06-29
Supplement: Supplementary file 1 [file bg-2017-217-supplement.pdf]

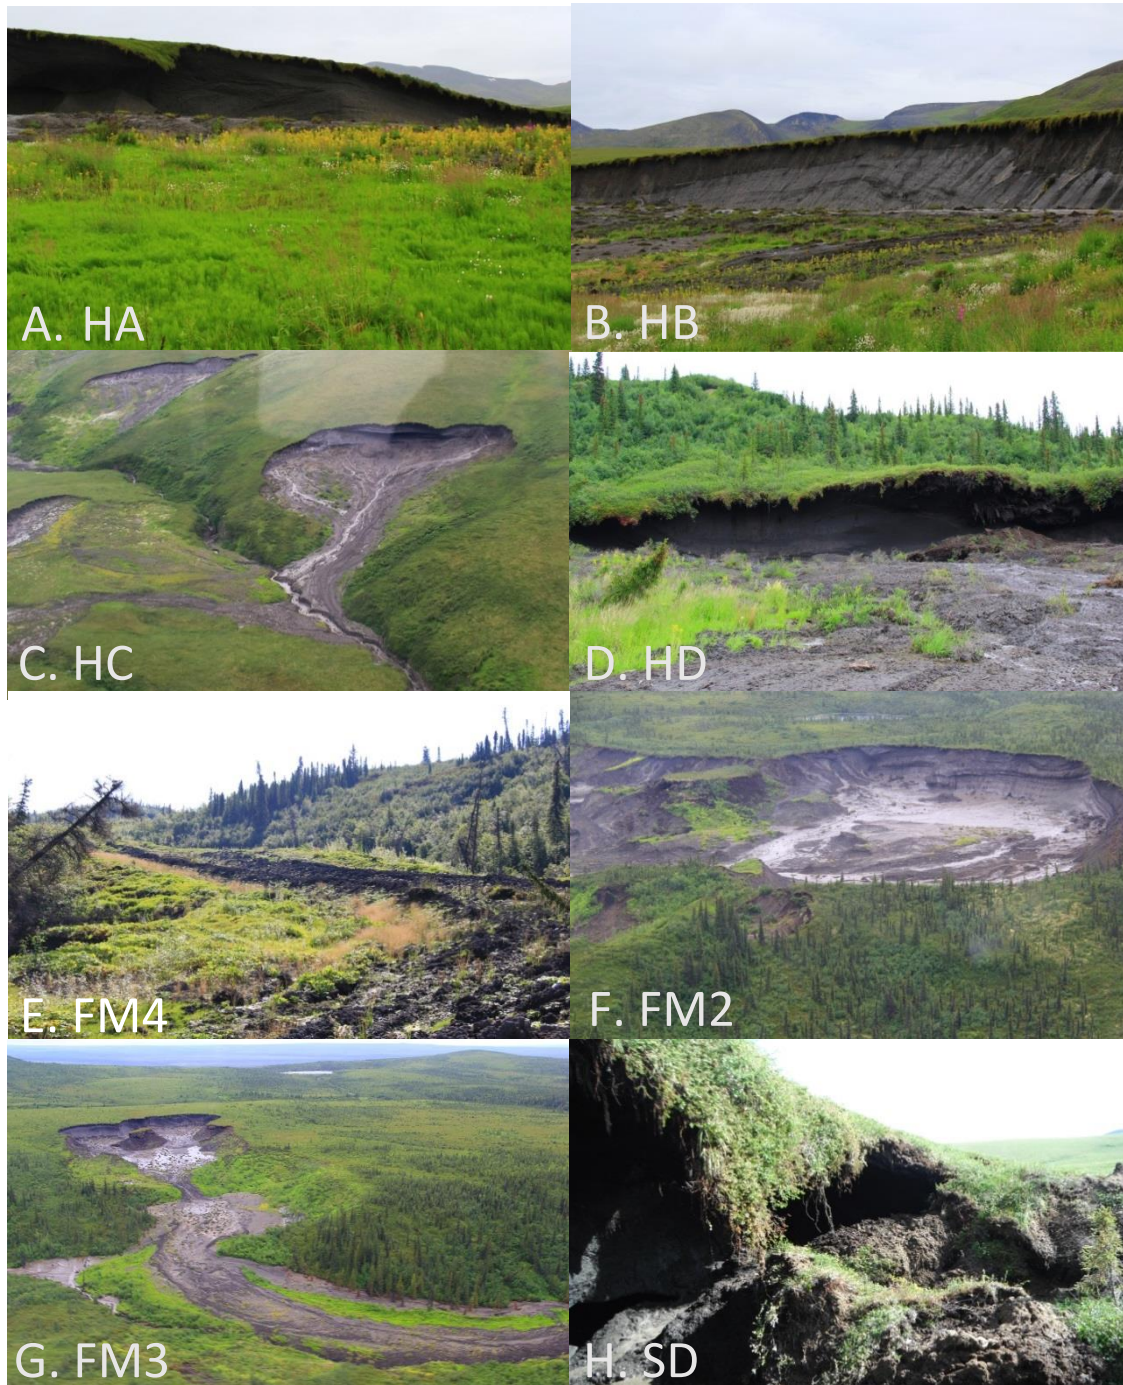

**Figure S1:** Images of the eight individual retrogressive thaw slumps sampled during the summer of 2014. A) Slump HA with revegetated scar zone B) Slump HB showing ice-rich headwall C) Slump HC (furthest on the right) with a large active scar zone and debris tongue D) Slump HD, smaller, with an overhanging active layer adjacent to a larger stream E) Slump FM4, shows revegetating debris tongue of a recently stabilized mega slump F) Slump FM2, an active mega slump, with numerous lobes (largest lobe shown) G) Slump FM3, an active mega slump, location of environmental correlation sampling H) Slump SD, recently initiated by stream erosion, with a shallow headwall and a large overhanging active layer. See Table 1 for detailed slump characteristics.
