# Supplementary material for: Retrogressive thaw slumps temper dissolved organic carbon delivery to streams of the Peel Plateau, NWT, Canada
Source: Copernicus journal article supplement (doi:10.5194/bg-2017-217), 2017-06-29
Supplement: Supplementary file [file bg-2017-217-AC3-supplement.pdf]

1 **Retrogressive thaw slumps temper dissolved organic carbon delivery to streams of the Peel Plateau,**  
2 **NWT, Canada**

3  
4 Cara A. Bulger<sup>1\*</sup>, Suzanne E. Tank<sup>1</sup>, and Steven V. Kokelj<sup>2</sup>

5  
6 <sup>1</sup>Department of Biological Sciences, University of Alberta, Edmonton, AB, Canada, T6G 2E9

7 <sup>2</sup>Northwest Territories Geological Survey, Government of the Northwest Territories, Yellowknife, NT,  
8 Canada

9 \*Author for correspondence: cara.bulger@gmail.com

10

11

12 **Abstract**

13 In Siberia and Alaska, permafrost thaw has been associated with significant increases in the delivery of  
14 dissolved organic carbon (DOC) to recipient stream ecosystems. Here, we examine the effect of  
15 retrogressive thaw slumps (RTS) on DOC concentration and transport, using data from eight RTS features  
16 on the Peel Plateau, NT, Canada. Like extensive regions of northwestern Canada, the Peel Plateau is  
17 comprised of thick, ice-rich tills that were deposited at the margins of the Laurentide Ice Sheet. RTS  
18 features are now widespread in this region, with headwall exposures up to 30 m high, and total  
19 disturbed areas often exceeding 30 ha. We find that intensive slumping on the Peel Plateau is universally  
20 associated with decreasing DOC concentrations downstream of slumps, even though the composition of  
21 slump-derived dissolved organic matter (DOM; assessed using specific UV absorbance and slope ratios)  
22 is similar to permafrost-derived DOM from other regions. Comparisons of upstream and downstream  
23 DOC flux relative to changes in total suspended solids suggest that the substantial fine-grained  
24 sediments released by RTS features may sequester DOC. Runoff obtained directly from within slump  
25 features, above entry into recipient streams, indicates that the deepest RTS features, which thaw the  
26 greatest extent of buried, Pleistocene-aged glacial tills, have the lowest runoff DOC concentrations when  
27 compared to upstream, un-disturbed locations. In contrast, shallower features, with exposures that are  
28 more limited to a relict Holocene active layer, have within-slump DOC concentrations more similar to  
29 upstream sites. Finally, fine-scale work at a single RTS site indicates that temperature and precipitation  
30 serve as primary environmental controls on above-slump and below-slump DOC flux, but that the  
31 relationship between climatic parameters and DOC flux is complex for these dynamic thermokarst  
32 features. These results demonstrate that we should expect striking variation in thermokarst-associated  
33 DOC mobilization across Arctic regions, but that within-region variation in thermokarst intensity and  
34 other landscape factors is also important for determining biogeochemical response. An understanding of  
35 landscape and climate history, permafrost genesis, soil composition, the nature and intensity of  
36 thermokarst, and the interaction of these factors, is critical for predicting changes in land-to-water

Deleted: continental ice sheet

Deleted: a conservative tracer

Deleted: slumping

Deleted: on this landscape

Deleted: feature

42 carbon mobilization in a warming Arctic.

43

**Deleted:** circumpolar world

45 **1. Introduction**

46 Anthropogenic climate change is significantly affecting the Canadian Arctic cryosphere (IPCC,  
47 2014). Temperature increases in Arctic regions are predicted to be at least 40% greater than the global  
48 mean, while precipitation is also expected to increase significantly in many locations (IPCC, 2014). The  
49 resulting degradation of permafrost is forecast to have wide-ranging effects, because thawing has the  
50 potential to greatly alter the physical, chemical, and biological functioning of landscapes (Frey and  
51 McClelland, 2009; Khvorostyanov et al., 2008a, 2008b; Kokelj et al., 2017b; Schuur et al., 2008, 2013). In  
52 particular, permafrost acts as a long term storage medium for solutes and sediments, and as a barrier to  
53 the participation of permafrost-sequestered constituents within active biogeochemical cycles (Frey and  
54 McClelland 2009; Vonk et al. 2015b). Consequently, permafrost thaw can enhance linkages between  
55 terrestrial and aquatic systems, via increased transport of terrestrial compounds from land to water  
56 (Kokelj et al. 2013; Tanski et al., 2016; Vonk et al., 2015b). Given that northern circumpolar permafrost  
57 stores of carbon are estimated to be almost double that of the atmospheric carbon pool (Hugelius et al.,  
58 2014), there is great potential for large increases in carbon mobilization as a result of permafrost thaw  
59 (Schuur et al., 2015). Within this context, the mobilization of dissolved organic carbon (DOC) from  
60 previously frozen soils is of particular interest, because DOC acts as the primary substrate for the  
61 microbially-mediated mineralization of organic carbon to carbon dioxide (Battin et al., 2008), while also  
62 serving as the primary vehicle for the delivery of terrestrial carbon to the Arctic Ocean (Dittmar and  
63 Kattner, 2003; Holmes et al., 2012; Spencer et al., 2015). As a result, the implications of thaw-mediated  
64 DOC mobilization may range from effects on the permafrost-carbon feedback, to the ecological and  
65 biogeochemical functioning of streams, rivers, and the nearshore ocean (e.g. Fritz et al. 2017; Tank et  
66 al., 2012b; Vonk et al., 2015b).

67 Permafrost thaw can manifest in many different forms, ranging from an increase in active layer  
68 thickness and terrain subsidence, to thermokarst features that significantly reconfigure the physical  
69 structure of the landscape. Of these, thermokarst has the potential to rapidly expose significant

Deleted: (IPCC, 2014)

Deleted: (Walsh et al., 2011)

Deleted: (McGuire et al., 2009)

Deleted: s

Deleted: s

Deleted: increasing

Deleted: global

Deleted: transport

Deleted: land to water

Deleted: ; Spencer et al., 2015

Deleted: . Dissolved organic carbon also forms the majority of total organic carbon flux in most Arctic rivers (Spencer et al., 2015), and is thus the primary vehicle for the delivery of terrestrial carbon to the Arctic Ocean

84 quantities of previously-frozen soils to biological and chemical processing (Abbott et al., 2014, 2015;  
 85 Kokelj and Jorgenson, 2013; Malone et al., 2013; Tanski et al. 2017). One of the most conspicuous  
 86 manifestations of thermokarst is the retrogressive thaw slump (RTS; Fig. 1), which develops as a result of  
 87 mass wasting, in ice-rich glacial deposits across northwestern Canada, Alaska, and western Siberia  
 88 (Kokelj et al., 2017b), and in Yedoma regions of Alaska and Siberia (Murton et al., 2017). Thaw slumps  
 89 are widespread throughout glaciated terrain in the western Canadian Arctic (Kokelj et al., 2017b; Lantuit  
 90 et al. 2012), including on the Peel Plateau (Lacelle et al., 2015). These dynamic landforms develop via  
 91 the ablation of an ice-rich headwall and – through the coupling of geomorphic and thermal processes –  
 92 are particularly efficient at thawing thick zones of ice-rich permafrost and translocating large volumes of  
 93 sediment from slopes to downstream environments (see Fig. 1). RTS features remain active for decades  
 94 (Lantuit et al. 2012). They typically stabilize following sediment accumulation at the base of the  
 95 headwall (Kokelj et al., 2015), but can reactivate causing thaw within the scar zone, and upslope  
 96 expansion of the disturbance (Kokelj et al., 2013; Lantuit and Pollard, 2008). During periods of activity,  
 97 thawed materials accumulate as a saturated slurry in the slump scar zone (see Fig. 1b) and are  
 98 translocated downslope by mass flow processes, which are accelerated by meltwater- and rainfall-  
 99 induced saturation (Kokelj et al. 2015). During active and stabilized periods, surface runoff can also  
 100 remove solutes and suspended sediment from the thawed substrate to downstream environments.  
 101 Although variation in temperature, precipitation and solar radiation have been correlated with  
 102 development rates and growth of RTS features (Kokelj et al., 2009, 2013, 2015; Lacelle et al., 2010;  
 103 Lewkowicz, 1986, 1987), we know little about how these and other environmental drivers might control  
 104 permafrost-DOC dynamics at the individual-slump to small watershed scale.

**Deleted:** that insulates the ground ice and arrests thaw

**Deleted:** retrogressive thaw slumps

**Deleted:** s

**Deleted:** commonly

**Deleted:** downslope

105 On the Peel Plateau, an individual thaw slump can impact tens of hectares of terrain, displace  
 106 hundreds of thousands of cubic meters of sediments, and significantly alter surface water sediment and  
 107 solute loads (Kokelj et al., 2013; Malone et al., 2013), and thus downstream ecosystems (Chin et al.,  
 108 2016; Malone et al., 2013). The magnitude of these disturbances and their cumulative impacts is great

114 enough to alter solute loads in the Peel River (70,000 km<sup>2</sup> watershed area; Kokelj et al., 2013), even  
 115 though only a small portion of that river's total catchment area (<1%) is influenced by thermokarst  
 116 (Kokelj et al., 2017b; Segal et al., 2016). This contrasts with many other thaw-affected regions, where  
 117 increases in solute loads following permafrost disturbance can be transient (e.g., limited to spring  
 118 freshet) and have little overall effect on annual solute fluxes (for example, in High Arctic regions affected  
 119 by active layer detachments; Lafrenière & Lamoureux, 2013). In addition, permafrost thaw on the Peel  
 120 Plateau is notable in that it exposes vast quantities of mineral-rich glacial till, which is overlain by a  
 121 relatively shallow layer of slightly more organic-rich soils (Duk-Rodkin and Hughes, 1992; Kokelj et al.  
 122 2017a). Although this till-associated, RTS-susceptible landscape type is found across the Laurentide and  
 123 Barents-Kara glacial margins of Canada, Alaska, and Siberia (Kokelj et al. 2017b), it contrasts with  
 124 regions of Alaska and eastern Siberia that are either Yedoma-rich or were patchily glaciated during the  
 125 late Pleistocene, which have been common focus points for study of permafrost-DOC interactions to  
 126 date (Abbott et al., 2014, 2015; Drake et al., 2015; Mann et al., 2012; Vonk et al., 2013b).

127 Thermokarst has been documented to enhance DOC concentrations in recipient aquatic  
 128 ecosystems in several Arctic regions (Frey and McClelland, 2009; Tank et al., 2012a; Vonk et al., 2013a;  
 129 Vonk and Gustafsson, 2013). In Alaska, streams draining thaw slumps have higher DOC concentrations  
 130 than un-affected systems across various terrain types (2-3 fold increase; Abbot et al., 2014), while in  
 131 eastern Siberia the DOC concentration in runoff from thawing Yedoma is considerably greater than  
 132 concentrations in recipient river systems (~30-fold elevation; Spencer et al. 2015). However, multiple  
 133 factors, including variable carbon content in permafrost soils (Hugelis et al. 2014) and variation in  
 134 ground ice type and volume (Fritz et al. 2015), may affect DOC release from permafrost. In regions where  
 135 thermokarst transports fine-grained sediments to aquatic systems, sorption processes may also be  
 136 important, because dissolved organic matter (DOM) can readily sorb to mineral soils (e.g., Kothawala et  
 137 al. 2009). Sorption to mineral sediments can cause DOM to be rapidly removed from solution in stream  
 138 systems (Kaiser and Guggenberger, 2000; Kothawala et al. 2009; McDowell, 1985), while also enabling

**Deleted:** e

**Deleted:** permafrost

**Deleted:** landscape type is found across glaciated permafrost terrains of the circumpolar North

**Deleted:** h

**Deleted:** e.g.,

**Deleted:** and

**Deleted:** In several Arctic regions, p

**Deleted:** ermafrost thaw, including t

**Deleted:** ,

**Deleted:** For example

**Deleted:** in Alaska

**Deleted:** in eastern Siberia

**Deleted:**

**Deleted:** with

**Deleted:** thaw

**Deleted:** This

**Deleted:** rapid process

**Deleted:** is largely regulated by the chemical composition and clay content of mineral sediments (Kothawala et al. 2009), and

**Deleted:** .The DOM-mineral complex can be an important mechanism for

161 the downstream transport and continued sequestration of organic carbon (Hedges et al., 1997). This  
 162 process may be particularly important for regulating DOC dynamics in glacial margin landscapes such as  
 163 those in the western Canadian Arctic, where a predisposition to thaw slumping results in an abundance  
 164 of thermokarst-related slope disturbances which mobilize fine-grained glacial sediment stores to  
 165 downstream systems (Kokelj et al., 2017a, 2017b; Lantuit et al. 2012; Rampton, 1988). Although the  
 166 mechanisms governing the thaw-mediated transport of DOC from land to freshwater seem likely to  
 167 differ in till-dominated landscapes when compared to other regions studied to date, little is known  
 168 about the downstream consequences of permafrost thaw for carbon biogeochemistry in regions such as  
 169 the Peel Plateau.

**Deleted:** Sorption

**Deleted:** processes

**Deleted:** transport

**Deleted:** the glaciated

**Deleted:** landscape

**Deleted:** thermokarst

**Deleted:** effectively

170 The objective of this study is to quantify how RTS features affect the concentration and  
 171 composition of DOC across a series of slump-affected streams on the Peel Plateau, and to examine how  
 172 observed variation in slump morphology affects DOC dynamics in slump-affected downstream  
 173 environments. We further investigate how short-term variation in precipitation, temperature, and solar  
 174 radiation affect DOC delivery from land to water, using measurements of DOC flux above and below a  
 175 single RTS feature. We target the thermokarst-sensitive Peel Plateau for this work, which is  
 176 characteristic of till-rich, glacial margin landscapes throughout Canada, Alaska, and Siberia (Kokelj et al.  
 177 2017b). By comparing our results to those from other regions, this allows us to consider how broad  
 178 variation in permafrost soil composition, permafrost genesis, and Quaternary history may drive variation  
 179 in land-freshwater DOC dynamics across divergent regions of the Arctic affected by permafrost thaw.

**Deleted:** In this study, we

**Deleted:** on the Peel Plateau

**Deleted:** within

**Deleted:** recipient stream systems

**Deleted:** , to explore how DOC mobilization from land to water is affected by thermokarst in this region.

**Deleted:** , to explore the drivers of temporal variation in DOC flux

**Deleted:** specifically

**Deleted:** se

**Deleted:** glacial deposits

**Deleted:** are

**Deleted:** large portions

**Deleted:** of the circumpolar Arctic, to explicitly

**Deleted:** s

**Deleted:** ,

**Deleted:** influence

**Deleted:** variability

**Deleted:** permafrost-DOC interactions

**Deleted:** vast

**Deleted:** Arctic regions. The study results broaden our understanding of land-water carbon mobilization in permafrost terrain, and indicate that slumping on the Peel Plateau may act to temper the flux of DOC within this landscape, via mineral-carbon interactions. These findings also underline the importance of landscape characteristics and geological inheritance for determining the biogeochemical effects of thermokarst, particularly as hillslope thermokarst intensifies across many Arctic regions (Kokelj et al., 2017b).

## 182 2 Study Site

### 183 2.1 General study site description

184 Our study was conducted on the Peel Plateau, situated in the eastern foothills of the Richardson

220 Mountains, NWT, Canada, in the zone of continuous permafrost (Fig. 1a). The fluvially-incised Plateau  
 221 ranges in elevation from 100 to 650 masl. The region was covered by the Laurentide Ice Sheet (LIS) for a  
 222 brief period (a maximum of 2,000-3,000 years) 18,500 cal yr BP (Lacelle et al., 2013). The bedrock of the  
 223 region is Lower Cretaceous marine shale from the Arctic River formation (Norris, 1984) and siltstone  
 224 overlain by Late Pleistocene glacial, glacio-fluvial and glacio-lacustrine sediments (Duk-Rodkin and  
 225 Hughes, 1992), covered by a shallow organic layer. These Pleistocene deposits host ice-rich permafrost.  
 226 Radiocarbon dating in the region has placed the age of relict ground ice in the late Pleistocene epoch  
 227 (18,100 ± 60 <sup>14</sup>Cyr BP; Lacelle et al., 2013). Upper layers of permafrost thawed during the early Holocene  
 228 and host younger, Holocene-aged organic materials (7890 ± 250 <sup>14</sup>Cyr BP; Lacelle et al., 2013). These are  
 229 clearly delineated from deeper Pleistocene-aged permafrost by a thaw unconformity (Burn 1997; Fig. 1),  
 230 which developed when warmer climate during the early Holocene prompted the thawing of near-  
 231 surface permafrost and a regional increase in active layer thickness, enabling the leaching of soluble ions  
 232 and integration of organic matter into these previously thawed soils (see Fig. 1c-d). Subsequent  
 233 aggradation of permafrost due to gradual cooling has archived this notable stratigraphic variation in  
 234 geochemistry, organic matter content, and cryostructure (Burn 1997; Fritz et al. 2012; Kokelj et al.,  
 235 2002; Lacelle et al., 2014; Murton and French, 1994).  
 236 Ice-marginal glaciogenic landscapes such as the Peel Plateau host thick layers of ice-rich  
 237 sediments, and thus have a predisposed sensitivity to climate-driven thaw slump activity (Kokelj et al.,  
 238 2017). On the Peel Plateau, slumping is largely constrained by the maximum extent of the LIS, because  
 239 the thick layers of ice-rich permafrost necessary for RTS activity are not present beyond its glacial limits  
 240 (Lacelle et al., 2015). Fluvial incision provides the topographic gradients necessary for thaw slump  
 241 development and RTS features are common; ranging in size from small, newly developing features,  
 242 which are relatively numerous, to those greater than 20 ha, which are rare (<5% prevalence; Lacelle et  
 243 al., 2015). The recent intensification of slumping on the Peel Plateau is driven in part by increasing air  
 244 temperatures and summer rainfall intensity (Kokelj et al., 2015). This intensification is also increasing the

**Deleted:** (Kokelj et al., 2016)

**Deleted:** (Catto, 1996)

**Deleted:** Laurentian

**Deleted:** Carbon

**Deleted:** and <sup>18</sup>O measurements

**Deleted:** have

**Deleted:** es

**Deleted:** is



253 thaw of the deepest layer of ice-rich, organic-poor, Pleistocene-aged glacial till that underlie this  
254 region. The pattern of abundant thaw slump development across ice-marginal glaciated permafrost  
255 landscapes extends from the Peel Plateau across the western Canadian Arctic, and persists at  
256 continental scales (Kokelj et al., 2017b).

257

## 258 2.2 Regional climate

259 The regional climate is typical of the subarctic with long, cold winters and short, cool summers.  
260 Mean annual air temperature (1981-2010) at the Fort McPherson weather station (Fig. 1a) is -7.3 °C  
261 with average summer (June-August) temperatures of 13.3 °C (Environment Canada, 2015). A warming  
262 trend of 0.77 °C per decade since 1970 has been recorded; however these increases are most apparent  
263 in the winter months (Burn and Kokelj, 2009). Our sample period spanned the thaw months of July and  
264 August; average 1981-2010 temperatures for those months, recorded at Fort McPherson, are 15.2 and  
265 11.8 °C, respectively, similar to temperatures at Fort McPherson during 2014 (15.6 and 11.6 °C), but  
266 slightly higher than 2014 averages observed at a recently established meteorological station on the Peel  
267 Plateau (Fig. 1a; 13.2 °C in July and 9.5 °C in August). Annual cumulative rainfall (1981-2010) at Fort  
268 McPherson averages 145.9 mm, with July and August having the highest rainfall levels at 46.4 and 39.1  
269 mm (Environment Canada, 2015). In 2014, rainfall for July and August was 71 and 121 mm at Fort  
270 McPherson, and 128.7 and 170.7 mm on the Peel Plateau. This continues the trend for this region of  
271 increasingly wet summers with numerous extreme rainfall events (Kokelj et al., 2015).

272

## 273 3 Methods

### 274 3.1 Slump site selection

275 Eight RTS features were selected from across the study region, using aerial surveys and previous  
276 knowledge of features across this landscape (Fig. 1; Fig. S1; Table 1). Selected slumps possessed a debris  
277 tongue that extended to the valley bottom and directly impacted a stream system. Sampling at each

Deleted: more elevated, centrally-located meteorological station

Deleted: (Fig. 1a) during our study

Deleted: the

Deleted: weather station

Deleted: makes 2014 a cooler year than average, and

Deleted: ter

284 slump occurred at three discrete locations: upstream, within-slump, and downstream of slump influence  
285 (Fig. 1b). Upstream sites were trunk streams that connected with the slump flow path further  
286 downstream, and were un-affected by any major geomorphic disturbance and thus representative of an  
287 undisturbed, pristine environment. Within-slump sampling locations were locations of channelized  
288 slump runoff within the scar zone or upper debris tongue. Downstream sampling locations were located  
289 below the confluence of the sampled upstream flow and all within-slump runoff paths, and were chosen  
290 to be representative of slump impact on aquatic ecosystems across the Peel Plateau landscape. In one  
291 instance (Slump HD, August 17), a fluidized flow event between sampling events saturated the scar zone  
292 and obliterated within-slump channelized surface flow. As a result, the within-slump sample taken at  
293 this site was not representative of typical channelized slump runoff that characterized all other slump  
294 sampling conditions, and has been discarded from all analyses.

295 A general classification of the slumps is difficult as these features are influenced by a diverse  
296 range of geomorphic processes that vary in intensity over time (Table 1; Fig. S1). Three of the slumps  
297 (FM4, FM2, FM3) are classified as ‘mega slumps’, characterised by areas greater than 5 ha, a headwall  
298 greater than 4 m in height, and a debris tongue that connects the slope to the valley below (Kokelj et al.,  
299 2013, 2015). Of these, FM4 possesses a headwall approximately 20 m in height, but was largely  
300 stabilized in 2014, indicated by the small outflow, long, dry, and significantly revegetated debris tongue  
301 (Fig. S1). FM2 is among the largest active slumps in the region, with a headwall 25-30 m high and visible  
302 as a much smaller feature in air photos since 1944 (Lacelle et al. 2015). FM2 geochemistry and  
303 geomorphology were previously described by Malone et al. (2013). Slump FM3, which was chosen for  
304 our ‘environmental controls’ work (further described below) covers an area of approximately 10 ha, and  
305 has a headwall of approximately 10 m in height and a debris tongue that extends nearly 600 m down  
306 valley (Table 1). Headwall retreat rate at FM3 over a 20 year period has been calculated at 12.5 m yr<sup>-1</sup>  
307 (Lacelle et al., 2015). SD is the smallest and youngest slump that we studied, and was initiated when  
308 diversion of a small creek caused lateral bank erosion. In 2014, the SD headwall was 2-4 m high with a

Deleted: substantial

Deleted: is currently

Deleted: T

Deleted: is

313 scar zone extending approximately 20m, and no defined debris tongue. The remaining slump sites (HA,  
 314 HB, HC, HD) were all well-developed active RTS features with headwalls similar to, or smaller than, FM3,  
 315 but with debris tongues much smaller in volume (Table 1). With the exception of SD, slump headwalls  
 316 exposed permafrost well below a thaw unconformity, indicating that Pleistocene-aged, unweathered  
 317 glacial materials were being thawed by the slump (Lacelle et al., 2013).

**Deleted:** that extends

**Deleted:** that are

**Deleted:** are

### 319 3.2 Field sampling and data collection

#### 320 3.2.1 The effect of slumping on DOC and stream water chemistry

321 The majority of our sampling was conducted during the summer of 2014. Of the eight slumps  
 322 that were sampled, three were accessed from the Dempster Highway three times over the sampling  
 323 season, one (FM3; see also 3.2.2) was accessed twice from the highway, and four were accessed twice  
 324 via helicopter (Table 1). At each of the upstream, downstream, and within-slump sampling locations,  
 325 specific conductivity, pH, and temperature were recorded using a YSI Pro Plus multi-parameter meter.

**Deleted:** At each slump, samples were collected at upstream, downstream, and within-slump locations.

326 Water samples were collected from directly below the stream surface into 1 L acid washed HDPE bottles  
 327 and allowed to sit in chilled, dark conditions for 24 hours to enable the considerable sediments in these  
 328 samples to partially settle out of suspension. Sample water was then filtered with pre-combusted  
 329 (475°C, 4 hours) Whatman GF/F filters (0.7 µm pore size). Filtered sample water was transferred into 40  
 330 mL acid washed, pre-combusted glass bottles for DOC analysis, or 60 mL acid washed HDPE bottles for  
 331 the analysis of absorbance and major ions. DOC samples were acidified with hydrochloric acid (1 µL mL<sup>-1</sup>), following Vonk et al. (2015b). The GF/F filters were retained for analysis of total suspended solids,

**Deleted:** substantial

332 (TSS). Samples for stable water isotopes were collected directly from streams into acid washed 40 mL  
 333 HDPE bottles with no headspace and sealed. During summer 2016, samples were additionally collected  
 334 from a subset of slump locations (FM2, FM3, FM4 and SD) for the <sup>14</sup>C signature of DOC at upstream and  
 335 within-slump sites. DO<sup>14</sup>C samples were collected in acid-washed polycarbonate bottles, allowed to  
 336 settle for 24 hours, and filtered using pre-combusted Whatman GF/F filters into pre-combusted glass

**Deleted:** All samples were refrigerated until analysis.

**Deleted:** sediment

**Deleted:** ?

**Deleted:** analysis

**Deleted:** analyses

**Deleted:** . Bottles were

**Deleted:** and refrigerated until analysis

**Deleted:** Field

**Formatted:** Superscript

**Deleted:** pre

**Deleted:** 1-2 L

media bottles with phenolic screw caps with butyl septa. All samples were refrigerated until analysis.  
Absorbance samples were analyzed within 1 week of collection, cation samples within 4 months of  
collection, and DOC (including <sup>14</sup>C) samples within 1-2 months of collection. Samples for Fe and  $\delta^{18}\text{O}$   
were analyzed within 6 months of collection.

Deleted: Sample bottles were wrapped in aluminum foil and

Formatted: Superscript

Deleted: ¶

### 3.2.2 Environmental controls on DOC flux

To explore how environmental variables control the flux of DOC from RTS-affected streams, we  
visited slump FM3 an additional 17 times beyond the sampling described above. This intensively-studied  
site was chosen to be representative of active Peel Plateau slumps that are eroding Holocene- to  
Pleistocene-aged sediments. During each visit, we measured discharge at the upstream and downstream  
locations to calculate DOC flux, and collected upstream and downstream DOC concentration samples.  
Downstream discharge was measured using an OTT C2 current meter at three locations across the small  
stream and at 40% depth. Due to the shallow, low flow conditions at the upstream site, upstream  
discharge was measured using the cross sectional method (Ward and Robinson, 2000). In both cases,  
discharge was calculated as the product of velocity and stream cross-sectional area. Local daily climate  
data were obtained from an automated meteorological station established in 2010 by the Government  
of the Northwest Territories (Kokelj et al. 2015). The station is located within 2 km of slump FM3 (Fig.  
1a) and is instrumented for the measurement of air temperature, rainfall, and net radiation.

Deleted: previously

## 3.3 Laboratory analyses

### 3.3.1 Major ions, dissolved organic carbon, $\delta^{18}\text{O}$ and $\text{DO}^{14}\text{C}$

Cation concentrations ( $\text{Ca}^{2+}$ ,  $\text{Mg}^{2+}$ ,  $\text{Na}^+$ ) were analyzed on a Perkin Elmer Analyst 200 Atomic  
Absorption Spectrometer at York University. A subset of collected samples were analyzed for total  
dissolved Fe at the University of Alberta on an Inductively Coupled Plasma - Optical Emission  
Spectrometer (Thermo Scientific ICAP6300), to allow for the correction of our Specific UV Absorbance

382 results (see below). DOC samples were analyzed on a Shimadzu TOC-V analyzer; DOC was calculated as  
383 the mean of the best 3 of 5 injections with a coefficient of variation of <2%; the precision of a 10 mg L<sup>-1</sup>  
384 caffeine standard across all sample runs was 0.32 mg L<sup>-1</sup>. A Picarro liquid water isotope analyzer was  
385 used to measure δ<sup>18</sup>O at the University of Alberta, following filtration (0.45 µm cellulose acetate,  
386 Sartorius) into 2 mL autosampler vials (National Scientific), without headspace. The precision of our  
387 δ<sup>18</sup>O analysis is ± 0.2%. The radiocarbon signature of DOC was measured following extraction and  
388 purification at the A.E. Lalonde AMS facility (University of Toronto) using a 3MV tandem accelerator  
389 mass spectrometer (High Voltage Engineering) following established methodologies (Lang et al., 2016;  
390 Palstra and Meijer, 2014; Zhou et al., 2015), and is reported with an error estimate of 1σ.

Deleted: variance

Formatted: Superscript

Formatted: Superscript

Deleted: stable water isotope samples

392 3.3.2 Total suspended solids

Deleted: sediments

393 Samples for TSS were filtered in the field for later analysis, ensuring that there was enough  
394 sediment on the pre-combusted (475°C, 4 hours) and pre-weighed GF/F filters. Filters were stored  
395 frozen, dried at 60°C for 8 hours, placed in a desiccator overnight and promptly weighed. TSS was  
396 calculated as the difference in filter weight before and after sediment loading, divided by volume  
397 filtered.

Deleted: total suspended sediments (

Deleted: )

399 3.3.3 Dissolved organic matter spectral characteristics

400 DOM composition was assessed using absorbance-based metrics. A 5 cm quartz cuvette was  
401 used to obtain UV-visible spectra data from 250-750 nm, using a Genesys 10 UV-Vis spectrophotometer.  
402 A baseline correction was applied to eliminate any minor interference from particles < 0.7 µm (Green  
403 and Blough, 1994). Specific UV absorbance at 254 nm (SUVA<sub>254</sub>), which is correlated with DOM  
404 aromaticity (Weishaar and Aiken, 2003), was calculated by dividing the decadal absorbance at 254 nm  
405 (m<sup>-1</sup>) by the DOC concentration (mg L<sup>-1</sup>). SUVA<sub>254</sub> values were corrected for Fe interference following  
406 Poulin et al. (2014) using maximum Fe concentrations from laboratory analyses or as reported in Malone

Deleted: potential

Deleted: following

Deleted: &

Deleted: (

et al. (2013). Spectral slopes between 275 and 295 nm, and 350 and 400 nm ( $S_{275-295}$ ,  $S_{350-400}$ ) were calculated following Helms et al. (2008), and are reported as positive values to adhere to mathematical conventions. Slope ratios ( $S_R$ ), which correlate with DOM molecular weight (Helms et al., 2008), were calculated as the ratio of  $S_{275-295}$  to  $S_{350-400}$ .

### 3.4 Statistical analyses and calculations

Statistical analyses were completed in R version 3.1.3 (R Core Team, 2015) using packages ‘nlme’ (Pinheiro et al., 2015), ‘lme4’ (Zeileis and Hothorn, 2002), ‘lmeSupport’ (Curtin, 2015), ‘car’ (Fox and Weisberg, 2011), and ‘zoo’ (Zeileis and Grothendieck, 2005). The effect of slumping on stream chemistry and optical characteristics was assessed using linear mixed effects models in the ‘nlme’ package of R. For each parameter, analyses were split into two separate models that included data for upstream and downstream chemistry, and upstream and within-slump chemistry. We used this approach to separately assess the effects of slumping downstream of slump systems, and to compare the composition of slump runoff to nearby, pristine environments. For each analysis, we included slump location (see Table 1) as a random effect, and considered models that either nested Julian date within the random effect of slump location, or allowed Julian date to occur as a fixed effect. The best model was chosen using the Akaike information criterion (AIC), and best-fit models were refit with a variance structure to ensure that model assumptions were met. The variance structures varIdent (for within-slump site and slump location) and varFixed (for Julian date) were used together (using varComb) and in isolation for this purpose (Zuur et al., 2009). AIC values for the weighted and un-weighted models were again compared to choose a final model of best fit for each analysis.

We used the high-frequency data from slump FM3 to assess how environmental conditions (rainfall, temperature, solar radiation) and TSS affect DOC delivery to slump-affected streams. To do this, we conducted multiple linear regressions, using AIC values to determine models of best fit (Burnham and Anderson, 2002). To enable a specific assessment of environmental controls on

Deleted: systems

442 downstream DOC flux, upstream DOC flux was separated out into a distinct regression analysis, because  
 443 upstream DOC flux was strongly correlated with flux downstream, and therefore overwhelmed all  
 444 environmental variables in the downstream model. Models were tested for serial correlation using the  
 445 auto-correlation function, and models with variance inflation factors greater than 10 or significant  
 446 Durbin Watson test results (indicative of correlated variables; Durbin & Watson, 1950; Hair et al., 1995)  
 447 were discarded. Residuals were examined to ensure the model was a good fit for the data (Zuur et al.,  
 448 2009). We considered both time-of-sampling (0 h) and past (48, 72, and 120 h) environmental conditions  
 449 in our analyses. Because cumulative values for environmental variables (i.e. accumulated rainfall in the  
 450 previous 48, 72 and 120 h) showed a strong positive correlation to one another, we used temporally  
 451 shifted data (i.e. rainfall 48, 72 and 120 h prior to the DOC flux measurement) in the final model. Similar  
 452 models were also constructed to examine the effects of environmental drivers on DOC concentration.

Deleted: (ACF)

453 Differences in paired upstream-downstream measures of DOC flux and concentration at slump FM3  
 454 were also assessed using a Wilcoxon Signed Rank Test, a non-parametric analog to the paired-t test.

Deleted: Finally, d

455 Following our finding of decreasing DOC concentrations downstream of slumps (see Sections 4.1  
 456 and 5.1) we used data from slump FM3, where we have upstream, downstream, and within-slump DOC  
 457 concentration measurements, and upstream and downstream discharge measurements, to calculate a  
 458 mass balance for DOC across the three sampling locations. These data – available for all three locations  
 459 on two dates during the summer of 2014 – were used to calculate DOC flux at upstream and  
 460 downstream sites as  $\text{flux}_{\text{DOCdown}} = [\text{DOC}]_{\text{down}} \bullet \text{discharge}_{\text{down}}$  or  $\text{flux}_{\text{DOCup}} = [\text{DOC}]_{\text{up}} \bullet \text{discharge}_{\text{up}}$ , and at  
 461 within-slump sites as  $\text{flux}_{\text{DOCwithin}} = (\text{discharge}_{\text{down}} - \text{discharge}_{\text{up}})$ . We calculate a similar mass balance for  
 462 TSS, which we use as a rough tracer for the inflow of slump runoff over the < 1 km span between  
 463 upstream and downstream locations at this site.

Formatted: Indent: First line: 0.5", No widow/orphan control

Deleted: ¶

#### 465 4. Results

469 4.1 DOC concentration across slump sites

470 While DOC concentrations ranged broadly across pristine streams on the Peel Plateau (Fig. 2;  
471 from 5.4 to 26.1 mg L<sup>-1</sup> at upstream, pristine sites), concentrations consistently declined downstream of  
472 slumps, when compared to paired, upstream locations (p<0.001; Fig. 2; Table 2). Although this effect  
473 was modest (typically less than 20%; Fig. 2), it occurred reliably across all slump sites. In contrast,  
474 comparisons of upstream and within-slump sites showed no consistent trend in DOC concentration,  
475 when evaluated across all slump locations (p=0.153; Fig. 2; Table 2). Instead, the effects of slumping on  
476 the DOC concentration of slump runoff varied by site. At the largest, most well-developed slump  
477 complexes (FM4, FM2, and FM3), where debris tongues are extensive and thaw extends well into the  
478 deepest layer of Pleistocene-aged glacial materials, DOC concentrations tended to be lower in slump  
479 runoff than at the paired upstream sites (Fig. 2). At more modestly-sized slump sites (HB, HC, and HD),  
480 where the modern and relict Holocene active layers form a greater proportion of the actively thawing  
481 headwall, within-slump DOC concentrations tended to be higher than values upstream (Fig. 2). Within  
482 each site, DOC concentrations were relatively consistent across the 2-3 sampling periods (Fig. 2).  
483

Deleted: On the Peel Plateau,

Formatted: Superscript

Deleted: was consistent

Deleted: appeared to vary

Deleted: However, there was significant variation in DOC concentration between slump locations (i.e., across the Peel Plateau landscape; Fig. 2).

484 4.2 Bulk chemistry of pristine waters and slump runoff

485 To better understand how the input of slump runoff affects downstream DOC, we examined  
486 concentrations of major ions, conductivity and TSS as 'tracers' of slump activity, because these  
487 constituents have previously been shown to be significantly affected by slumping in this region (Kokelj et  
488 al., 2005, 2013; Malone et al., 2013; Thompson et al., 2008). Major ion (Ca<sup>2+</sup>, Mg<sup>2+</sup>, Na<sup>+</sup>) concentrations  
489 in slump runoff were considerably greater than in pristine streams (a 2.7 to 11.7-fold increase; Fig. 3b-d;  
490 Table 2). These patterns were similar, though muted, at slump-affected downstream sites, where major  
491 ion concentrations were 1.5 to 3.5-fold greater than at pristine sites (Fig. 3b-d; Table 2). Average  
492 conductivity also increased significantly as a result of slumping (p< 0.001; Table 2): within-slump sites  
493 had conductivity values that were 9.2-fold greater than upstream sites, while downstream values were

Deleted: conservative



an average of 2.6 times greater than those upstream (Fig. 3e). Finally, TSS was also significantly elevated at slump-affected sites ( $p < 0.001$ ; Table 2) with levels being more than two orders of magnitude greater within slumps when compared to upstream, and more than one order of magnitude greater downstream, when compared to upstream sites (Fig. 3a). The effect of slump runoff on downstream chemistry is also reflected in DOC: ion, and DOC: TSS ratios, which decreased markedly between upstream and downstream locations. For example, molar ratios of  $(\text{Ca}^{2+} + \text{Mg}^{2+})$ : DOC averaged  $0.78 \pm 0.37$  (mean  $\pm$  standard error) upstream of slumps, but  $2.07 \pm 0.45$  downstream, while average gram-weight ratios of TSS: DOC were  $32 \pm 12$  upstream, but  $1454 \pm 332$  at downstream locations.

#### 4.3 Spectral and isotopic characteristics

SUVA<sub>254</sub>, which is positively correlated with DOM aromaticity (Weishaar and Aiken, 2003), was significantly lower within slumps, and downstream of slumps, than in upstream, pristine, environments ( $p < 0.001$ ; Fig. 4; Table 2). Average within-slump SUVA<sub>254</sub> was less than half of that observed for pristine waters (Fig. 4), while downstream values declined by approximately 20%. In accordance with the SUVA<sub>254</sub> results,  $S_{275-295}$ ,  $S_{350-400}$ , and  $S_R$  were all significantly greater within slumps when compared to upstream sites ( $p < 0.001$ ; Fig. 4; Table 2), indicating lower DOM molecular weight within slumps (Helms et al., 2008). Differences in slope parameters between upstream and downstream locations were muted relative to the within-slump: upstream comparisons (Fig. 4), with  $S_{275-295}$  ( $p = 0.011$ ) and  $S_R$  ( $p < 0.001$ ) increasing significantly, but more modestly, downstream of slumps, and  $S_{350-400}$  declining slightly ( $p = 0.001$ ; Fig. 4; Table 2).

Upstream  $\delta^{18}\text{O}$  averaged  $-20.1\text{‰} \pm 0.12$ , which corresponds to a modern active layer pore water  $\delta^{18}\text{O}$  signature for this region (Lacelle et al., 2013; Fig. 5). Within-slump  $\delta^{18}\text{O}$  was discernibly depleted when compared to upstream locations, with average values of  $-22.7\text{‰} \pm 0.72$ , which falls between previously-identified regional endmembers for Pleistocene-aged ground ice ( $18,100 \pm 60$   $^{14}\text{Cyr BP}$ ) and the modern active layer (Lacelle et al., 2013; Fig. 5). Within-slump  $\delta^{18}\text{O}$  was also much more variable

between RTS features than upstream and downstream  $\delta^{18}\text{O}$  values. Similar to upstream sites, downstream  $\delta^{18}\text{O}$  clustered near the modern active layer  $\delta^{18}\text{O}$  endmember, but with a small depletion that was consistent with a contribution from slump inflow ( $-20.7\text{‰} \pm 0.21$ ).

To further investigate the effect of water source on DOM composition, we examined the relationship between  $\text{SUVA}_{254}$  and  $\delta^{18}\text{O}$ . More depleted samples taken from within-slump sites had clearly depressed  $\text{SUVA}_{254}$  values when compared to samples with more enriched  $\delta^{18}\text{O}$  (Fig. 5). Of the large, most well-developed slumps that were identified in Section 4.1, two (FM2 and FM3), in addition to site HB, had  $\delta^{18}\text{O}$  values that were more depleted than the Holocene-aged icy diamicton values reported in Lacelle et al. (2013), suggesting some contribution of runoff from older, Pleistocene-aged permafrost (Fig. 5). It is likely that the  $\delta^{18}\text{O}$  signal at the relatively stable mega-slump site (FM4) was somewhat diluted by the 7.2 mm of rainfall that fell in the 48 hours preceding our sample. Although sites FM3 and SD received 12.4 and 3.5 mm of rain, respectively, in the 48 hours prior to sampling, these are both much more active slump sites, and thus less prone to dilution of the slump outwash signature. There was no significant rainfall immediately preceding sampling at any other sites.

The radiocarbon signature of DOC from upstream and within-slump locations at sites FM4, FM2, FM3, and SD largely mirrors the  $\delta^{18}\text{O}$  results. DOC from sites upstream of slump disturbances was approximately modern in origin (ranging from  $217 \pm 24$   $^{14}\text{C}$  yr BP to modern in age; Table 3). In contrast, within-slump waters from site FM2 and FM3 were early Holocene-aged ( $9592 \pm 64$ , and  $8167 \pm 39$   $^{14}\text{C}$  yr BP, respectively; Table 3). Slump runoff from site SD was older than at upstream sites, but younger than for the larger slumps, described above ( $1157 \pm 23$   $^{14}\text{C}$  yr BP; Table 3).

#### 4.4 Patterns and environmental drivers of DOC flux

Similar to our findings for the distributed sampling scheme (Fig. 2), downstream DOC concentration was consistently lower than concentrations upstream, across the 19 paired measurements taken at the intensively studied slump site (slump FM3;  $p < 0.001$ ,  $N=19$ ,  $W=0$ ; Wilcoxon

551 Signed Rank Test; mean decline of  $2.5 \pm 0.2 \text{ mg L}^{-1}$ , compared to a mean upstream concentration of  $13.6$   
 552  $\pm 0.5 \text{ mg L}^{-1}$ . To explore environmental drivers of DOC movement within this landscape, however, we  
 553 focus on DOC flux, which allows a direct assessment of slump-mediated DOC addition to this system.  
 554 Downstream DOC flux ( $\text{mg s}^{-1}$ ) tended to be slightly greater than upstream flux on most, but not all,  
 555 sampling occasions (Fig. 6). As a result, paired comparisons indicate no statistical difference between  
 556 upstream and downstream DOC flux at this site (Wilcoxon signed rank test;  $p=0.096$ ,  $N=19$ ,  $W=53$ ).  
 557 Because upstream and downstream DOC flux were strongly correlated to one another ( $r^2 = 0.94$ ;  
 558  $p<0.0001$ ), our downstream model was run without upstream DOC flux as a predictor variable. The best-  
 559 fit multiple linear regression model for downstream DOC flux ( $r^2 = 0.84$ ;  $p<0.01$ ) retained seven  
 560 variables, of which two were significant (Table 4). Of these, air temperature (72h prior to sampling)  
 561 showed a negative relationship with downstream DOC flux while rainfall (0h; time of sampling) showed  
 562 a strong positive relationship (Table 4). The best-fit model for upstream DOC flux ( $r^2 = 0.87$ ;  $p<0.001$ )  
 563 also retained seven variables, of which four were significant ( $p<0.05$ ; Table 4). Similar to the  
 564 downstream analysis, air temperature (0h, 72h) had a negative relationship, and time-of-sampling (0h)  
 565 rainfall had a strong positive relationship, with DOC flux (Table 4). However, 120h rainfall showed a  
 566 negative relationship with DOC flux in this model. Regressions assessing controls on downstream DOC  
 567 flux relative to upstream flux (i.e., as a ratio, or the difference between the two values) were not  
 568 significant. Models to explore controls on upstream and downstream DOC concentration were also  
 569 relatively similar to one another, showing strong, positive relationships between DOC concentration and  
 570 air temperature, and more modest negative relationships between DOC concentration and net radiation  
 571 (Table 4).

Deleted: )

Deleted: (as  $\text{mg s}^{-1}$ )

Deleted: and

Deleted: exploring

Deleted: ing

## 579 5. Discussion

### 580 5.1 Retrogressive thaw slumps and carbon delivery to streams of the Peel Plateau

581 In both Eastern Siberia (Spencer et al. 2015; Vonk et al., 2013b) and Alaska (Abbott et al., 2014),  
582 permafrost slumping has been associated with significant increases in DOC mobilization from  
583 permafrost thaw features to aquatic systems. Our data show that this was not the case on the Peel  
584 Plateau, where the landscape-induced variation in DOC concentration among pristine stream sites was  
585 much greater than the change in stream water DOC as a result of slumping. Across all of our study sites,  
586 DOC concentrations consistently decreased downstream of slumps when compared to upstream  
587 locations, while at an intensively-sampled slump, DOC flux did not differ significantly between upstream  
588 and downstream locations. In contrast, comparisons of channelized slump runoff (our within-slump  
589 sites) and paired un-affected sites showed no consistent DOC trend. Instead, DOC concentrations in  
590 slump runoff were either greater than, or less than, their comparison upstream locations, in a manner  
591 that differed depending on slump morphological characteristics such as slump size and headwall height  
592 (Fig. 1; see further discussion in Section 5.3). The moderate effect of slumping on DOC concentration  
593 occurred despite the significant influence of these disturbances on the delivery of many biogeochemical  
594 constituents to recipient streams. For example, conductivity was approximately one order of magnitude  
595 greater, and TSS two orders of magnitude greater, in slump-derived runoff than at upstream, un-  
596 affected sites. This led to substantially increased TSS:DOC and (Ca + Mg):DOC ratios downstream of  
597 slumps, when compared to pristine, upstream locations.

598 Decreasing DOC concentrations downstream of slumps, despite increasing concentrations of  
599 indicators of slump activity (major ions, TSS) could result from several, potentially co-occurring  
600 mechanisms. In some locations, decreases may be partially caused by low DOC concentrations in slump  
601 outflow (a dilution effect; see slumps FM2, FM3, and FM4 in Fig. 2; further discussed in Section 5.3).  
602 However, our results suggest that DOC sorption to suspended inorganic sediments could also play a role  
603 in regulating DOC dynamics in slump-affected systems on the Peel Plateau. At multiple sites (HB, HC, and

**Deleted:** (Drake et al., 2015; Mann et al., 2015; Vonk et al., 2013b),

**Deleted:** Balcarczyk et al., 2009;

**Deleted:** , and the Canadian High Arctic (Melville Island; Woods et al., 2011),

**Deleted:** to streams

**Deleted:** have

**Deleted:** causes

**Deleted:** ;

**Deleted:** field evidence suggests

614 HD), DOC concentrations declined downstream of slumps despite a modest elevation in DOC  
 615 concentration in slump drainage waters (Fig. 2). Thermokarst contributes significant amounts of fine-  
 616 grained glaciogenic sediment to fluvial systems on the Peel Plateau (Kokelj et al., 2013; silty-clay sediment  
 617 classification for FM3 in Lacelle et al., 2013). DOC sorption can occur in seconds to minutes in freshwater  
 618 systems (Qualls and Haines, 1992), with fine-grained materials being particularly conducive to this  
 619 process (Kothawala et al., 2009). Data from site FM3, where we have upstream and downstream  
 620 discharge data coupled with DOC and TSS concentrations at upstream, downstream, and within-slump  
 621 locations on two separate dates, allows us to assess possible DOC sorption at this site. On these dates,  
 622 DOC flux declines downstream of the slump (i.e.,  $\text{flux}_{\text{DOCdown}} < \text{flux}_{\text{DOCup}}$ ), despite a clear and measurable  
 623 efflux of DOC from the slump to the receiving stream system ( $\text{flux}_{\text{DOCwithin}}$ ; Fig. 7). This same calculation  
 624 using TSS as a rough tracer of slump inflow shows the calculated efflux of TSS from this slump  
 625 ( $\text{flux}_{\text{TSSwithin}}$ ) to be almost identical to the increase in TSS flux downstream of the disturbance (as  
 626  $\text{flux}_{\text{TSSdown}} - \text{flux}_{\text{TSSup}}$ ; Fig. 7). Thus, it seems likely that relatively rapid processes, such as sorption to  
 627 mineral surfaces, are affecting DOC dynamics in downstream fluvial systems on the Peel Plateau.

628 Although a similar decrease in DOC concentration with slumping has been found for lakes in this  
 629 region (Kokelj et al., 2005), our findings contrast with work to-date in other areas of the Arctic, where  
 630 thermokarst has been demonstrated to lead to an efflux of high-DOC waters from slump features (e.g.,  
 631 Abbott et al., 2014; Vonk et al., 2013a). Ice-marginal glaciated landscapes are common throughout the  
 632 western Canadian Arctic, however, and in many other Arctic regions. This terrain type is characterized by  
 633 thick, mineral-rich but carbon-poor tills, and high ice contents that are predisposed to intense climate-  
 634 driven thaw slumping and the release of glaciogenic sediments (Kokelj et al., 2017b). As a result, POC  
 635 'sequestration' following slumping seems unlikely to be limited to the Peel Plateau. Given the high TSS  
 636 export and apparent organic carbon sorption to glaciogenic sediments observed with slumping on the  
 637 Peel Plateau, we expect that substantial organic carbon is mobilized from these slumps in the particle-  
 638 attached, rather than dissolved, form (i.e., as particulate organic carbon; POC). Quantifying this POC

**Deleted:** (Kokelj et al., 2013), and this material is fine-grained

**Deleted:** e.g., sediments from the FM3 headwall have been classified as silty clay;

**Deleted:** these

**Deleted:** es

**Deleted:** within

**Deleted:** calculated as  $[\text{DOC}]_{\text{within}} \bullet (\text{discharge}_{\text{down}} - \text{discharge}_{\text{up}})$ ;

**Deleted:** conservative

**Deleted:** activity

**Deleted:** within-slump flux

**Deleted:** (as  $[\text{TSS}]_{\text{within}} \bullet (\text{discharge}_{\text{down}} - \text{discharge}_{\text{up}})$ )

**Deleted:** difference

**Deleted:** between

**Deleted:** and upstream locations

**Deleted:** is

**Deleted:** of slumps

**Deleted:** The

**Deleted:** downstream of Peel Plateau slumps

**Deleted:** is similar to, but more muted than results

**Deleted:** ,

**Deleted:** where following slump stabilization, lakes are characterized by increases in conductivity, clear decreases in DOC concentration, and a strong negative correlation between these two parameters

**Deleted:** . The greater magnitude of effect for lakes in this region is likely caused by substantial particle settling in lentic environments, which enables DOC scavenging with the inorganic sediment inputs of thermokarst (Kokelj et al., 2005). Although decreasing DOC with RTS activity on the Peel Plateau

**Deleted:** s

**Deleted:** regions (e.g., Abbott et al., 2014; Vonk et al., 2013a),

**Deleted:** i

**Deleted:** intensely affected by RTS

**Deleted:** ,

**Deleted:** (Kokelj et al., 2017b). In general, t

**Deleted:** typically

**Deleted:**

**Deleted:** which with their

**Deleted:** Thus, it seems likely that

**Deleted:** the processes we observe are not limited to the Peel Plateau: research to quantify

680 mobilization, its fate once subject to contemporary biogeochemical processing, and the mechanisms  
681 that enable DOC sequestration to occur, are key avenues for future research, on the Peel Plateau and  
682 elsewhere.

**Deleted:** via sorption processes seems warranted across regions where thermokarst intensifies the transport of mineral-rich sediments to downslope aquatic systems.

## 684 5.2 The effect of retrogressive thaw slumps on DOM composition

685 Despite the fact that DOC concentrations did not increase in RTS-affected streams, absorbance  
686 metrics clearly indicate that slump-derived DOM on the Peel Plateau is compositionally different than  
687 DOM from upstream locations. Upstream waters had significantly higher SUVA<sub>254</sub> values than  
688 downstream and within-slump sites (Table 2, Fig. 4). Similarly, while the average S<sub>R</sub> of Peel Plateau  
689 upstream waters ( $0.74 \pm 0.005$ ) was within the range of S<sub>R</sub> typically associated with fresh, terrestrial  
690 DOM ( $\sim 0.70$ ; Helms et al., 2008), values were significantly greater within-slump ( $0.92 \pm 0.015$ ) and  
691 downstream ( $0.89 \pm 0.009$ ) (Table 2, Fig. 4), indicating decreasing DOM molecular weight as a result of  
692 RTS activity. High SUVA<sub>254</sub> values accompanied by low S<sub>R</sub> at upstream sites suggest that water flow in  
693 undisturbed catchments is restricted to shallow, organic-rich flowpaths through the active layer, with  
694 permafrost inhibiting water contributions from deeper, groundwater or mineral-associated sources  
695 (Balcarczyk et al., 2009; MacLean et al., 1999; Mann et al., 2012; O'Donnell et al., 2010; Street et al.  
696 2016). In contrast, within-slump and downstream measurements indicate a clear transition in DOM  
697 source.

**Deleted:** , SUVA<sub>254</sub> and

**Deleted:** compared to

698 The comparatively low SUVA<sub>254</sub>, and high S<sub>R</sub> values for downstream and within-slump sites  
699 indicate that permafrost-derived carbon on the Peel Plateau is characterized by relatively low molecular  
700 weight and aromaticity, and is thus similar in its composition to permafrost carbon from other regions.  
701 For example, SUVA<sub>254</sub> values were low in waters draining active thaw slumps when compared to  
702 stabilized and undisturbed sites on the North Slope of Alaska (Abbott et al., 2014), while in Siberia, <sup>14</sup>C-  
703 depleted DOM from small tributary streams affected by thermokarst had lower SUVA<sub>254</sub> values  
704 compared to younger DOM from the Kolyma River mainstem (Mann et al., 2015; Neff et al., 2006).

710 Although SUVA<sub>254</sub> values for waters draining Peel Plateau thaw slumps are slightly lower than those  
711 reported for Siberian Yedoma disturbances (Mann et al., 2015), the overall similarity of permafrost-  
712 derived DOM composition across these various regions is striking, given the regional differences in  
713 permafrost origin and depositional history. For example, while the DOM released by permafrost thaw on  
714 the Peel Plateau is till-associated, and early-Holocene in mean age, east Siberian Yedoma is composed of  
715 loess-derived Pleistocene deposits that sequestered carbon in association with synengetic aggradation  
716 of permafrost. This suggests that common processes may enable the organic matter contained in  
717 permafrost soils to become compositionally similar across diverse Arctic regions. Such compositional  
718 similarity also indicates that permafrost-origin DOM from the Peel Plateau – similar to that from other  
719 regions (Abbott et al., 2014; Drake et al., 2015) – may be readily degraded by bacteria, despite the  
720 divergent origin of this carbon.

721

### 722 5.3 The effect of slump morphometry on runoff water biogeochemistry

723  $\delta^{18}\text{O}$  and  $\text{DO}^{14}\text{C}$  data provide further evidence that intense slumping enables novel sources of  
724 water and solutes to be transported to fluvial systems on the Peel Plateau. For most of the RTS features  
725 that we studied, the  $\delta^{18}\text{O}$  signature of within-slump waters ranged from those similar to the ‘icy  
726 diamicton’ that overlies the early Holocene thaw unconformity, to those for underlying Pleistocene-aged  
727 ground ice (Lacelle et al., 2013; Fig. 5). Similarly,  $\text{DO}^{14}\text{C}$  from a subset of sites indicates slump-derived  
728 DOC is early Holocene in age for all but the shallowest slump surveyed. This suggests that our slump  
729 outflow samples were likely comprised of a mixture of Pleistocene-, Holocene-, and modern-sourced  
730 water (see Fig. 1c-e), but that the contribution of these end-members varied across slumps depending  
731 on the relative volume of different stratigraphic units being mobilized.

Deleted: -aged

732 The between-site variation in  $\delta^{18}\text{O}$  signature (Fig. 5) and relative DOC concentration (Fig. 2b) of  
733 slump runoff waters appears to be related to differences in slump morphometry (size, headwall height,  
734 and the length and area of the debris tongue; see Table 1 and Fig. 1c-e) across sites. The well-developed,

larger slump complexes (FM4, FM2 and FM3) were more likely to have  $\delta^{18}\text{O}$  signatures that lie between end-member values for Holocene-aged icy diamicton and Pleistocene-aged ground ice (Fig. 5; although note that dry and stabilized FM4 differs somewhat from this trend). These well-developed slumps also stood out as displaying within-slump DOC concentrations that were lower than at upstream comparison sites (Fig. 2b). The headwall exposure at these largest slumps exposes Pleistocene-aged permafrost to several metres depth (see Fig. 1c), while the evacuation of scar zone materials have produced extensive debris tongues up to several kilometers long (Table 1, Figs. 1b, S1e and S1g). This significant exposure of mineral-rich, Pleistocene-aged glacial till contributes solutes from low-carbon mineral soils and low-DOC ground ice (Fritz et al. 2015; Tanskii et al. 2016) to runoff, while entraining fine-grained sediments which provide mineral surface area for possible DOC adsorption. Adsorption may be further enhanced as slump and stream runoff continue to entrain sediments as flows incise the lengthy debris tongue deposits. In contrast, slumps with slightly shallower headwalls (HA, HB, HC, HD; see Fig. 1d), and less well-developed debris tongues (Table 1), appear to elicit a slightly different response than the largest slumps discussed above. At these mid-sized sites, within-slump DOC concentrations were typically higher than those found at upstream comparison sites (Fig. 2b), which may reflect the greater relative inputs from thawing of the Holocene-aged relict active layer, and decreased interaction with debris tongue deposits at these smaller disturbances. Similarly, runoff  $\delta^{18}\text{O}$  tends to lie between Holocene and modern end-member values at these sites (though note the more depleted value for HB; Fig. 5), indicating a lower relative contribution of Pleistocene-aged ground ice to slump outflow waters.

Finally, the youngest and shallowest slump surveyed (SD), exposes only near-surface permafrost soils for leaching and geochemical transport (Figs. 1e and S1; Table 1), and not the underlying mineral and ice-rich glacial substrates. Accordingly, the effects of slumping on stream chemistry, optical parameters, and isotopes appear muted at SD when compared to the larger slumps discussed above. These morphometry-related shifts in the downstream effects of slumping suggest that we should expect non-linearity in the biogeochemical response as RTS features develop over time, particularly if slumping

Deleted: slump



continues to intensify with future warming on the Peel Plateau (e.g., Kokelj et al., 2017b). This

underscores the importance of long-term monitoring on the Peel Plateau and elsewhere, and indicates

that the incorporation of non-linearity into modelling efforts is critical for predicting future change,

Deleted: L

Deleted: models

Deleted: , are clearly warranted for the Peel Plateau and elsewhere in the Arctic

#### 5.4 Environmental controls on DOC flux and concentration

Air temperature and rainfall exerted the strongest control on DOC flux at our intensively studied

site, which was chosen to be representative of active Peel Plateau slumps that are eroding Holocene- to

Pleistocene-aged sediments (slump FM3; Fig. 6; Table 4). Upstream of the slump, rainfall was positively

Deleted:

correlated, and air temperature negatively correlated, with DOC flux. However, precipitation events are

negatively related to temperature at the upstream site (Fig. 6), suggesting that at the single-season scale

Deleted: this

of our investigation, precipitation served as the primary environmental control on DOC flux. DOC

concentration was relatively constant with discharge upstream ( $r=-0.342$ ,  $p=0.151$ ), indicating that

Deleted: at the

precipitation controls DOC flux largely as a result of changes in water flow in pristine streams on the

Deleted: site

Deleted: at this site

Peel Plateau, and that DOC was not source-limited over the time scale of our investigation. However,

Deleted: source

upstream DOC concentration was positively related to temperature (Table 4), suggesting that biological

Deleted: , however

activity is an important regulator of within-soil DOC production (c.f. Pumpanen et al., 2014). These

upstream-of-slump results are consistent with work from other undisturbed permafrost and boreal

regions, where precipitation and catchment runoff have been shown to control DOC flux in streams

(Prokushkin et al., 2005; Pumpanen et al., 2014), and increasing temperature has been shown to

increase DOC production in soils (Christ and David, 1996; Neff and Hooper, 2002; Prokushkin et al.,

2005; Yanagihara et al., 2000). They are also consistent with the concept that the permafrost barrier

Deleted: impermeable

forces precipitation to travel through the shallow active layer, where high hydraulic conductivity leads to

rapid transport of carbon into fluvial systems, and little degradation in soils (O'Donnell et al., 2010;

Deleted:

Striegl et al., 2005).

799 Slumping did not significantly affect downstream DOC flux at the intensively studied slump site,  
800 when compared to DOC flux upstream of this site (Fig. 6; Section 4.4). Although concentration  
801 consistently declined downstream at FM3 (Sections 4.1 and 4.4), downstream DOC flux was either  
802 slightly higher, or slightly lower, than upstream flux; a result that seems likely to play out at other,  
803 comparable Peel Plateau slumps, given the coherent concentration patterns that we observed with  
804 slumping, Concordant with the lack of change in DOC flux in response to slumping, neither the ratio of  
805 (downstream: upstream) or difference between (downstream – upstream) upstream and downstream  
806 DOC flux could be explained by any of our environmental variables, while downstream flux showed an  
807 almost identical relationship with environmental controls as those upstream (Table 4). The lack of clear  
808 environmental control on relative downstream: upstream DOC flux occurred despite the fact that  
809 precipitation has been shown to be a strong driver of ablation and sediment movement from slump  
810 features on the Peel Plateau, at time scales similar to those used for this work (Kokelj et al., 2015).

811 Considering the Peel Plateau landscape as a whole, it appears that precipitation serves as a  
812 primary, positive control on DOC flux. Thus, this study adds DOC production to the list of changes – such  
813 as increasing slump activity and sediment mobilization – that can be expected with the increases in  
814 precipitation that are underway in this region, and are predicted for many Arctic regions (IPCC, 2014;  
815 Kokelj et al., 2015). However, it appears that slumping does not over-ride the landscape-scale control on  
816 DOC flux in this system – at least at the scale of this single-season – perhaps because processes like DOC  
817 sorption mask the influx of slump-derived DOC (Fig. 6). This result highlights the complexity of the  
818 interaction between changing climatic parameters and DOC dynamics on the Peel Plateau, where slump  
819 features of increasing size incorporate thawing till, glaciolacustrine, glaciofluvial, and organic deposits,  
820 while also draining contemporary active layers across a shrub-tundra to spruce forest upland gradient,  
821 DOC dynamics are thus affected by both water and carbon generation across these variable landform  
822 types, and by biogeochemical interactions such as mineral adsorption in recipient systems. While future  
823 work to tease apart the interactions between changing climatic parameters, slump development, and

**Deleted:** modify

**Deleted:** slump FM3

**Deleted:** this site

**Deleted:** values

**Deleted:** , across the multiple measurement points

**Deleted:** that we considered

**Deleted:** this

**Deleted:** finding

**Deleted:** expected throughout the Arctic

**Deleted:** ; Walsh et al., 2011

**Deleted:** clearly

**Deleted:** ;

**Deleted:** additionally

**Deleted:** ;

**Deleted:** and where

**Deleted:** variably

**Deleted:** It also underscores the need for

841 resultant biogeochemical effects, is clearly warranted on the Peel Plateau and elsewhere, we must also  
 842 recognize that environmental controls on slump activity and thus downstream biogeochemistry can be  
 843 expected to show marked regional variation (see for example, work from Eureka Sound; Grom & Pollard  
 844 2008).

**Deleted:** ; both

**Deleted:** across the Arctic

**Deleted:** where

846 *5.5 Study implications and future research directions: Dissolved carbon mobilization across diverse*  
 847 *permafrost landscapes*

**Deleted:** dissolved

848 Carbon dynamics in Arctic aquatic systems are influenced by numerous factors, including  
 849 geology, Quaternary and glacial history, soil composition, vegetation, active layer dynamics, and the  
 850 nature and intensity of thermokarst. As a result, the effect of permafrost thaw on DOC concentration

851 and flux should – at a fundamental level – vary across broad, regional scales. Our results demonstrate,  
 852 that we can expect marked inter-regional variation in DOC transport to streams in response to  
 853 permafrost degradation. For example, declines in DOC concentration downstream of slumps on the Peel  
 854 Plateau clearly differ from what has been found in eastern Siberia and regions of Alaska, where  
 855 thermokarst releases substantial quantities of DOC (e.g., Spencer et al. 2015), and increases DOC  
 856 concentrations in downstream systems (Abbott et al. 2015). Efforts that incorporate information  
 857 concerning the geology and Quaternary history of thawing landscapes, the physical and geochemical  
 858 composition of permafrost soils, and the nature and intensity of thermokarst processes within  
 859 landscapes (see, for example, Olefeldt et al. 2016) will considerably increase our ability to accurately  
 860 predict how carbon delivery from land to water will respond to climate change on a pan-Arctic scale.

**Deleted:** This study

**Deleted:** s

**Deleted:** large

**Deleted:** s

**Deleted:** , and that results from multiple regions are needed to understand change across the Arctic as whole

**Deleted:** The

**Deleted:** strikingly

**Deleted:** for example,

**Deleted:** significantly

**Deleted:** Modelling e

**Deleted:** that are being thawed

**Deleted:** the

**Deleted:** would

**Deleted:** clearly enable more accurate predictions

**Deleted:** of

861 At finer scales, however, this work underscores the variability of thermokarst effects within  
 862 regions, and the local-scale control on this variability. On the Peel Plateau, for example, between-site  
 863 differences in the biogeochemical effect of thermokarst correspond to variation in soil stratigraphy (i.e.,  
 864 the relative depth of the Holocene aged paleo-active layer) and ever-evolving slump morphometry.  
 865 Although striking within-region variability in biogeochemical response to thermokarst has been seen

**Deleted:** underlines

**Deleted:** s

**Deleted:** the

**Deleted:** effects of

890 elsewhere (e.g., Watanabe et al., 2011), responses in other regions occur as a result of very different –  
 891 and region-specific – landscape-level drivers. This landscape-specificity also extends to the non-linear,  
 892 biogeochemical response as slump features develop over time. Changes in downstream  
 893 biogeochemistry with slump development are very different on the Peel Plateau, for example, than in  
 894 other regions (e.g., Abbot et al. 2015), while non-linearity can also be expected to extend to different  
 895 types of permafrost thaw (Kokelj et al. 2002, Vonk et al. 2016), such as increasing active layer thickness  
 896 (Romanovsky et al. 2010). Only with a tiered approach, where we work within regions to understand  
 897 how local controls drive regional responses to thaw, and across regions to document how predictable,  
 898 broad-scale variation controls responses at continental to pan-Arctic scales, will we be able to  
 899 understand the future biogeochemical functioning of thermokarst-affected landscapes throughout  
 900 Arctic regions.

Deleted: it

Deleted: s

Deleted: ity of

Deleted: the

Deleted: The changing response of

Deleted: is

Deleted: focus

Deleted: and changing effects over time

Deleted: affects the nature of thermokarst effects

Deleted: truly

Deleted: at the pan-Arctic scale

## 903 Acknowledgements

904 Financial support for this research was provided by Ontario Graduate Scholarship, York University  
 905 Fieldwork Cost Fund, York University Research Cost Fund, Northern Scientific Training Program, NSERC  
 906 Discovery and Northern Research Supplement grants to SET, the Campus Alberta Innovates Program,  
 907 and the Polar Continental Shelf Program. We would like to thank Scott Zolkos for his support as a field  
 908 assistant and for the production of Figure 1; S. Tetlich, D. Neyando, and P. Snowshoe for field sampling  
 909 assistance; and the Tetlit Gwich'in (Fort McPherson) Renewable Resources Council. Sarah Shakil and  
 910 Scott Zolkos assisted with the collection of samples for DO<sup>14</sup>C; Justin Kokoszka performed geospatial  
 911 calculations of slump area and debris tongue length. Comments from Michael Fritz and one anonymous  
 912 reviewer greatly improved the content of the manuscript.

924 **Literature Cited**

- 925 Abbott, B. W., Larouche, J. R., Jones, J. B., Bowden, W. B., and Balser, A. W.: Elevated dissolved organic  
 926 carbon biodegradability from thawing and collapsing permafrost, *J. Geophys. Res.*, 119, 2049–2063,  
 927 doi:10.1002/2014JG002678, 2014.
- 928 Abbott, B. W., Jones, J. B., Godsey, S. E., Larouche, J. R., and Bowden, W. B.: Patterns and persistence of  
 929 hydrologic carbon and nutrient export from collapsing upland permafrost, *Biogeosciences*, 12, 3725–  
 930 3740, doi:10.5194/bg-12-3725-2015, 2015.
- 931 Balcarczyk, K. L., Jones, J. B., Jaffé, R., and Maie, N.: Stream dissolved organic matter bioavailability and  
 932 composition in watersheds underlain with discontinuous permafrost, *Biogeochemistry*, 94, 255–270,  
 933 doi:10.1007/s10533-009-9324-x, 2009.
- 934 Battin, T. J., Kaplan, L. A., Findlay, S., Hopkinson, C. S., Marti, E., Packman, A. I., Newbold, J. D., and  
 935 Sabater, F.: Biophysical controls on organic carbon fluxes in fluvial networks, *Nat. Geosci.*, 1, 95–100,  
 936 doi:10.1038/ngeo101, 2008.
- 937 Burn, C. R.: Cryostratigraphy, paleogeography, and climate change during the early Holocene warm  
 938 interval, western Arctic coast, Canada. *Can. J. Earth Sci.* 34, 912–925, doi: 10.1139/e17-076, 1997.
- 939 Burn, C. R. and Kokelj, S. V.: The environment and permafrost of the Mackenzie Delta area, *Permafr.*  
 940 *Periglac. Process.*, 20, 83–105, doi:10.1002/ppp.655, 2009.
- 941 Burnham, K. P. and Anderson, D. R.: Model Selection and Multi- Model Inference: A Practical  
 942 Information-Theoretic Approach, Springer, New York., 2002.
- 943 Chin, K. S., Lento, J., Culp, J. M., Lacelle, D., and Kokelj, S. V.: Permafrost thaw and intense thermokarst  
 944 activity decreases abundance of stream benthic macroinvertebrates, *Glob. Chang. Biol.*, 22, 2715–2728,  
 945 doi:10.1111/gcb.13225, 2016.
- 946 Christ, M. J. and David, M. B.: Temperature and moisture effects on the production of dissolved organic  
 947 carbon in a Spodosol, *Soil Biol. Biochem.*, 28, 1191–1199, doi:10.1016/0038-0717(96)00120-4, 1996.
- 948 Curtin, J.: lmsupport: Support for Linear Models. R package version 2.9.2., 2015.
- 949 Dittmar, T. and Kattner, G.: The biogeochemistry of the river and shelf ecosystem of the Arctic Ocean: a  
 950 review, *Mar. Chem.*, 83, 103–120, doi:10.1016/S0304-4203(03)00105-1, 2003.
- 951 Drake, T. W., Wickland, K. P., Spencer, R. G. M., McKnight, D. M., and Striegl, R. G.: Ancient low-  
 952 molecular-weight organic acids in permafrost fuel rapid carbon dioxide production upon thaw, *Proc.*  
 953 *Natl. Acad. Sci.*, 112, 13946–13951, doi:10.1073/pnas.1511705112, 2015.
- 954 Duk-Rodkin, A. and Hughes, O. L.: Surficial Geology, Fort McPherson-Bell River. Yukon-Northwest  
 955 Territories. Geological Survey of Canada, Map 1745A, scale 1:250 000, Geological Survey of Canada, Map  
 956 1745A, scale 1:250 000, 1992.
- 957 Durbin, J. and Watson, G. S.: Testing for serial correlation in least squares regression I, *Biometrika*, 37,  
 958 409–428, 1950.
- 959 Environment Canada: Canadian Climate Normals 1981–2010 Station Data, Fort McPherson, 2015.
- 960 Fox, J. and Weisberg, S.: An {R} Companion to Applied Regression, Second Edition. Thousand Oaks CA:

Field Code Changed

**Deleted:** Catto, N. R.: Richardson Mountains, Yukon-Northwest Territories: The northern portal of the postulated “Ice-Free Corridor,” *Quat. Int.*, 32, 3–19, doi:10.1016/1040-6182(95)00062-3, 1996.¶

965 Sage. <http://socserv.socsci.mcmaster.ca/jfox/Books/Companion.>, 2011.

966 Frey, K. E. and McClelland, J. W.: Impacts of permafrost degradation on arctic river biogeochemistry,  
 967 Hydrol. Process., 23, 169–182, doi:10.1002/hyp, 2009.

968 Fritz, M., Vonk, J. E., and Lantuit, H.: Disappearing Arctic coastlines, Nat. Clim. Change, 7, 6-7,  
 969 doi:10.1038/nclimate3188, 2017.

970 Fritz, M., Opel, T., Tanski, G., Herzsich, U., Meyer, H., Eulenburg, A., and Lantuit, H.: Dissolved organic  
 971 carbon (DOC) in Arctic ground ice, The Cryosphere, 9, 737-752, doi:10.5194/tc-9-737-2015, 2015.

972 Fritz, M., Wetterich, S., Schirrmeister, L., Meyer, H., Lantuit, H., Preusser, F., and Pollard, W. H.: Eastern  
 973 Beringia and beyond: Late Wisconsinan and Holocene landscape dynamics along the Yukon Coastal  
 974 Plain, Canada. Palaeogeogr. Palaeoclimatol. Palaeoecol., 319–320, 28–45, doi:  
 975 10.1016/j.palaeo.2011.12.015, 2012.

976 Fulton, R. J.: Surficial Materials of Canada, Natural Resources Canada., 1995.

977 Green, S. A. and Blough, N. V.: Optical absorption and fluorescence properties of chromophoric  
 978 dissolved organic matter in natural waters, Limnol. Oceanogr., 39, 1903–1916,  
 979 doi:10.4319/lo.1994.39.8.1903, 1994.

980 Hair, J. F. J., Anderson, R. E., Tatham, R. L., and Black, W. C.: Multivariate Data Analysis, 3rd ed.,  
 981 Macmillan, New York., 1995.

982 Hedges, J. I., Keil, R. G., and Benner, R.: What happens to terrestrial organic matter in the ocean?, Org.  
 983 Geochem., 27, 195–212, 1997.

984 Helms, J. R., Stubbins, A., Ritchie, J. D., Minor, E. C., Kieber, D. J., and Mopper, K.: Absorption spectral  
 985 slopes and slope ratios as indicators of molecular weight, source, and photobleaching of chromophoric  
 986 dissolved organic matter, Limnol. Oceanogr., 53, 955–969, doi:10.4319/lo.2008.53.3.0955, 2008.

987 Holmes, R. M., McClelland, J. W., Peterson, B. J., Tank, S. E., Bulygina, E., Eglinton, T. I., Gordeev, V. V.,  
 988 Gurtovaya, T. Y., Raymond, P. A., Repeta, D. J., Staples, R., Striegl, R. G., Zhulidov, A. V., and Zimov, S. A.:  
 989 Seasonal and annual fluxes of nutrients and organic matter from large rivers to the Arctic Ocean and  
 990 surrounding seas, Estuaries and Coasts, 35, 369–382, doi:10.1007/s12237-011-9386-6, 2012.

991 Hugelius, G., Strauss, J., Zubrzycki, S., Harden, J. W., Schuur, E. A. G., Ping, C. L., Schirrmeister, L., Grosse,  
 992 G., Michaelson, G. J., Koven, C. D., O'Donnell, J. A., Elberling, B., Mishra, U., Camill, P., Yu, Z., Palmtag, J.,  
 993 and Kuhry, P.: Estimated stocks of circumpolar permafrost carbon with quantified uncertainty ranges  
 994 and identified data gaps, Biogeosciences, 11, 6573–6593, doi:10.5194/bg-11-6573-2014, 2014.

995 IPCC: Topic 2: Future Climate Changes, Risks, and Impacts In Climate Change 2014: Synthesis Report.  
 996 Contribution of Working Groups I, II and III to the Fifth Assessment Report of the Intergovernmental  
 997 Panel on Climate Change [Core Writing Team, R.K. Pachauri and L.A. Meyer (eds.)]. IPCC, Geneva,  
 998 Switzerland, 151 pp, Geneva, Switzerland., 2014.

999 Kaiser, K. and Guggenberger, G.: The role of DOM sorption to mineral surfaces in the preservation of  
 1000 organic matter in soils, Org. Geochem., 31, 711–725, doi:10.1016/S0146-6380(00)00046-2, 2000.

1001 Khvorostyanov, D. V., Krinner, G., Ciais, P., Heimann, M., and Zimov, S. A.: Vulnerability of permafrost  
 1002 carbon to global warming. Part I: Model description and role of heat generated by organic matter

1003 decomposition, *Tellus, Ser. B Chem. Phys. Meteorol.*, 60 B, 250–264, doi:10.1111/j.1600-  
1004 0889.2007.00333.x, 2008a.

1005 Khvorostyanov, D. V., Ciais, P., Krinner, G., Zimov, S. A., Corradi, C., and Guggenberger, G.: Vulnerability  
1006 of permafrost carbon to global warming. Part II: Sensitivity of permafrost carbon stock to global  
1007 warming, *Tellus, Ser. B Chem. Phys. Meteorol.*, 60 B, 265–275, doi:10.1111/j.1600-0889.2007.00336.x,  
1008 2008b.

1009 Kokelj, S. V., Tunnicliffe, J. F., and Lacelle, D.: The Peel Plateau of northwestern Canada : an ice-rich  
1010 hummocky moraine landscape in transition, in *Landscapes and Landforms of western Canada*, edited by  
1011 O. Slaymaker, pp. 109–122, Springer International Publishing, Switzerland., 2017a.

1012 Kokelj, S. V. and Jorgenson, M. T.: Advances in thermokarst research, *Permafr. Periglac. Process.*, 24,  
1013 108–119, doi:10.1002/ppp.1779, 2013.

1014 Kokelj, S. V., Smith, C. A., and Burn, C. R.: Physical and chemical characteristics of the active layer and  
1015 permafrost, Herschel Island, western Arctic Coast, Canada, *Permafr. Periglac. Process.*, 13, 171–185,  
1016 doi:10.1002/ppp.417, 2002.

1017 Kokelj, S. V., Jenkins, R. E., Milburn, D., Burn, C. R., and Snow, N.: The influence of thermokarst  
1018 disturbance on the water quality of small upland lakes, Mackenzie Delta region, Northwest Territories,  
1019 Canada, *Permafr. Periglac. Process.*, 16, 343–353, doi:10.1002/ppp.536, 2005.

1020 Kokelj, S. V., Lantz, T. C., Kanigan, J. C., Smith, S. L., and Coutts, R.: Origin and polycyclic behaviour of  
1021 tundra thaw slumps, Mackenzie Delta region, Northwest Territories, Canada, *Permafr. Periglac. Process.*,  
1022 20, 173–184, doi:10.1002/ppp, 2009.

1023 Kokelj, S. V., Lacelle, D., Lantz, T. C., Tunnicliffe, J., Malone, L., Clark, I. D., and Chin, K. S.: Thawing of  
1024 massive ground ice in mega slumps drives increases in stream sediment and solute flux across a range of  
1025 watershed scales, *J. Geophys. Res. Earth Surf.*, 118, 681–692, doi:10.1002/jgrf.20063, 2013.

1026 Kokelj, S. V., Tunnicliffe, J., Lacelle, D., Lantz, T. C., Chin, K. S., and Fraser, R.: Increased precipitation  
1027 drives mega slump development and destabilization of ice-rich permafrost terrain, northwestern  
1028 Canada, *Glob. Planet. Change*, 129, 56–68, doi:10.1016/j.gloplacha.2015.02.008, 2015.

1029 Kokelj, S. V., Lantz, T. C., Tunnicliffe, J., Segal, R., and Lacelle, D.: Climate-driven thaw of permafrost  
1030 preserved glacial landscapes, northwestern Canada, *Geology*, 45, 371–374, doi:10.1130/G38626.1,  
1031 2017b.

1032 Kothawala, D. N., Moore, T. R., and Hendershot, W. H.: Soil properties controlling the adsorption of  
1033 dissolved organic carbon to mineral soils, *Soil Sci. Soc. Am. J.*, 73, 1831–1842,  
1034 doi:10.2136/sssaj2008.0254, 2009.

1035 Lacelle, D., Bjornson, J., and Lauriol, B.: Climatic and geomorphic factors affecting contemporary (1950-  
1036 2004) activity of retrogressive thaw slumps on the Aklavik Plateau, Richardson Mountains, NWT,  
1037 Canada, *Permafr. Periglac. Process.*, 21, 1–15, doi:10.1002/ppp.666, 2010.

1038 Lacelle, D., Lauriol, B., Zazula, G., Ghaleb, B., Utting, N., and Clark, I. D.: Timing of advance and basal  
1039 condition of the Laurentide Ice Sheet during the last glacial maximum in the Richardson Mountains,  
1040 NWT, *Quat. Res. (United States)*, 80, 274–283, doi:10.1016/j.yqres.2013.06.001, 2013.

1041 Lacelle, D., Fontaine, M., Forest, A. P., and Kokelj, S.: High-resolution stable water isotopes as tracers of

1042 thaw unconformities in permafrost: A case study from western Arctic Canada, *Chem. Geol.*, 368, 85–96,  
1043 doi:10.1016/j.chemgeo.2014.01.005, 2014.

1044 Lacelle, D., Brooker, A., Fraser, R. H., and Kokelj, S. V.: Distribution and growth of thaw slumps in the  
1045 Richardson Mountains–Peel Plateau region, northwestern Canada, *Geomorphology*, 235, 40–51,  
1046 doi:10.1016/j.geomorph.2015.01.024, 2015.

1047 Lafrenière, M. J. and Lamoureux, S. F.: Thermal perturbation and rainfall runoff have greater impact on  
1048 seasonal solute loads than physical disturbance of the active layer, *Permafr. Periglac. Process.*, 24, 241–  
1049 251, doi:10.1002/ppp.1784, 2013.

1050 Lang, S. Q., McIntyre, C. P., Bernasconi, S. M., Früh-Green, G. L., Voss, B. M., Eglinton, T. I., and Wacker,  
1051 L.: Rapid  $^{14}\text{C}$  analysis of dissolved organic carbon in non-saline waters, *Radiocarbon*, 58, 505–515,  
1052 doi:10.1017/RDC.2016.17, 2016.

1053 Lantuit, H. and Pollard, W. H.: Fifty years of coastal erosion and retrogressive thaw slump activity on  
1054 Herschel Island, southern Beaufort Sea, Yukon Territory, Canada, *Geomorphology*, 95, 84–102,  
1055 doi:10.1016/j.geomorph.2006.07.040, 2008.

1056 Lantuit, H., Pollard, W. H., Couture, N., Fritz, M., Schirrmeister, L., Meyer, H., and Hubberten, H.W.:  
1057 Modern and late Holocene retrogressive thaw slump activity on the Yukon Coastal Plain and Herschel  
1058 Island, Yukon Territory, Canada. *Permafrost Periglacial Process.* 23, 39–51, doi: 10.1002/ppp.1731, 2012.

1059 Lantz, T. C. and Kokelj, S. V.: Increasing rates of retrogressive thaw slump activity in the Mackenzie Delta  
1060 region, N.W.T., Canada, *Geophys. Res. Lett.*, 35, 1–5, doi:10.1029/2007GL032433, 2008.

1061 Lewkowicz, A. G.: Rate of short-term ablation of exposed ground ice, Banks Island, Northwest  
1062 Territories, Canada, *J. Glaciol.*, 32, 511–519, 1986.

1063 Lewkowicz, A. G.: Headwall retreat of ground-ice slumps, Banks Island, Northwest Territories, *Can. J.*  
1064 *Earth Sci.*, 24, 1077–1085, doi:10.1139/e87-105, 1987.

1065 MacLean, R., Oswood, M. W., Irons, J. G., and McDowell, W. H.: The effect of permafrost on stream  
1066 biogeochemistry: A case study of two streams in the Alaskan (U.S.A.) taiga, *Biogeochemistry*, 47, 239–  
1067 267, doi:10.1007/BF00992909, 1999.

1068 Malone, L., Lacelle, D., Kokelj, S., and Clark, I. D.: Impacts of hillslope thaw slumps on the geochemistry  
1069 of permafrost catchments (Stony Creek watershed, NWT, Canada), *Chem. Geol.*, 356, 38–49,  
1070 doi:10.1016/j.chemgeo.2013.07.010, 2013.

1071 Manley, W. F. and Kaufman, D. S.: *Alaska PaleoGlacier Atlas: Institute of Arctic and Alpine Research*  
1072 *(INSTAAR), University of Colorado.*, 2002.

1073 Mann, P. J., Davydova, A., Zimov, N., Spencer, R. G. M., Davydov, S., Bulygina, E., Zimov, S., and Holmes,  
1074 R. M.: Controls on the composition and lability of dissolved organic matter in Siberia’s Kolyma River  
1075 basin, *J. Geophys. Res. Biogeosciences*, 117, G01028, doi:10.1029/2011JG001798, 2012.

1076 Mann, P. J., Eglinton, T. I., McIntyre, C. P., Zimov, N., Davydova, A., Vonk, J. E., Holmes, R. M., and  
1077 Spencer, R. G. M.: Utilization of ancient permafrost carbon in headwaters of Arctic fluvial networks, *Nat.*  
1078 *Commun.*, 6, 7856, doi: 10.1038/ncomms8856, 2015.

1079 McDowell, W. H.: Kinetics and mechanisms of dissolved organic carbon retention in a headwater stream,



Biogeochemistry, 1, 329–352, 1985.

Murton, J. and French, H.: Cryostructures in permafrost, Tuktoyaktuk coastlands, western arctic Canada, *Can. J. Earth Sci.*, 31, 737–747, doi:10.1139/e94-067, 1994.

Murton, J. B., Edwards, M. E., Lozhkin, A. V., Anderson, P. M., Savvinov, G. N., Bakulina, N., Bondarenko, O. V., Cherepanova, M. V., Danilov, P. P., Boeskorov, V., Goslar, T., Grigoriev, S., Gubin, S. V., Korzun, J. A., Lupachev, A. V., Tikhonov, A., Tsygankova, V. I., Vasilieva, G. V., and Zanina, O. G.: Preliminary paleoenvironmental analysis of permafrost deposits at Batagaika megaslump, Yana Uplands, northeast Siberia, *Quat. Res.*, 87, 314–330, doi:10.1017/qua.2016.15, 2017.

Neff, J. C. and Hooper, D. U.: Vegetation and climate controls on potential CO<sub>2</sub>, DOC and DON production in northern latitude soils, *Glob. Chang. Biol.*, 8, 872–884, doi:10.1046/j.1365-2486.2002.00517.x, 2002.

Neff, J. C., Finlay, J. C., Zimov, S. A., Davydov, S. P., Carrasco, J. J., Schuur, E. A. G., and Davydova, A. I.: Seasonal changes in the age and structure of dissolved organic carbon in Siberian rivers and streams, *Geophys. Res. Lett.*, 33, 1–5, doi:10.1029/2006GL028222, 2006.

Norris, D. K.: Geology of the northern Yukon and northwestern District of Mackenzie. Geological Survey of Canada, Map 1581A, scale 1:500 000, 1984.

O'Donnell, J. A., Aiken, G. R., Kane, E. S., and Jones, J. B.: Source water controls on the character and origin of dissolved organic matter in streams of the Yukon River basin, Alaska, *J. Geophys. Res. Biogeosciences*, 115, 1–12, doi:10.1029/2009JG001153, 2010.

Olefeldt, D., Goswami, S., Grosse, G., Hayes, D., Hugelius, G., Kuhry, P., McGuire, A. D., Romanovsky, V. E., Sannel, A. B. K., Schuur, E. A. G., and Turetsky, M. R.: Circumpolar distribution and carbon storage of thermokarst landscapes, 7, 13043, 2016.

Palstra, S. and Meijer, H.: Biogenic carbon fraction of biogas and natural gas fuel mixtures determined with <sup>14</sup>C, *Radiocarbon*, 56, 7–28, doi:10.2458/56.16514, 2014.

Pinheiro, J., Bates, D., DebRoy, S., Sarkar, D., and R Core Team: nlme: Linear and nonlinear mixed effects models. R package version 3.1-120, <http://CRAN.R-project.org/package=nlme>, 2015.

Poulin, B. A., Ryan, J. N., and Aiken, G. R.: Effects of iron on optical properties of dissolved organic matter, *Environ. Sci. Technol.*, 48, 10098–10106, doi:10.1021/es502670r, 2014.

Prokushkin, A. S., Kajimoto, T., Prokushkin, S. G., McDowell, W. H., Abaimov, A. P., and Matsuura, Y.: Climatic factors influencing fluxes of dissolved organic carbon from the forest floor in a continuous-permafrost Siberian watershed, *Can. J. For. Res.*, 35, 2130–2140, doi:10.1139/x05-150, 2005.

Pumpanen, J., A. L., Heli, M., Kolari, P., Ilvesniemi, H., Mammarella, I., Hari, O., Nikinmaa, E., Heinonsalo, J., Back, J., Ojala, A., Berninger, F., and Vesala, T.: Precipitation and net ecosystem exchange are the most important drivers of DOC flux in upland boreal catchments, *J. Geophys. Res. Biogeosciences*, 119, 1861–1878, doi:10.1002/2014JG002705, 2014.

Qualls, R. and Haines, B. L.: Measuring adsorption isotherms using continuous, unsaturated flow through intact soil cores, *Soil Sci. Soc. Am. J.*, 56, 456–460, doi:10.2136/sssaj1992.03615995005600020019x, 1992.

**Deleted:** McGuire, A. D., Anderson, L. G., Christensen, T. R., Dallimore, S., Guo, L., Hayes, D. J., Heimann, M., Lorenson, T. D., MacDonald, R. W. and Roulet, N.: Sensitivity of the carbon cycle in the Arctic to climate change, *Ecol. Monogr.*, 79, 523–555, doi:10.1890/08-2025.1, 2009.

1123 R Core Team: R: A Language and Environment for Statistical Computing, R Foundation for Statistical  
 1124 Computing, Vienna, Austria. <http://www.r-project.org/>, 2015.

1125 Rampton, V. N.: Quaternary geology of the Tuktoyaktuk coastlands, Northwest Territories, Geol. Surv.  
 1126 Canada, 1988.

1127 Romanovsky, V. E., Smith, S. L., and Christiansen, H. H.: Permafrost thermal state in the polar Northern  
 1128 Hemisphere during the international polar year 2007–2009: a synthesis, Permafrost Periglacial Process.,  
 1129 21, 106–116, doi: 10.1002/ppp.689, 2010.

1130 Schuur, E., Bockheim, J., Canadell, J. G., Euskirchen, E., Field, C. B., Goryachkin, S. V., Hagemann, S.,  
 1131 Kuhry, P., Lafleur, P. M., Lee, H., Nelson, M. F. E., Rinke, A., Romanovsky, V. E., Shiklomanov, N.,  
 1132 Tarnocai, C., Venevsky, S., Vogel, J. G., and Zimov, S. A.: Vulnerability of permafrost carbon to climate  
 1133 change : Implications for the global carbon cycle, Bioscience, 58, 701–714, doi:10.1641/B580807, 2008.

1134 Schuur, E. A. G., Abbott, B. W., Bowden, W. B., Brovkin, V., Camill, P., Canadell, J. G., Chanton, J. P.,  
 1135 Chapin, F. S., Christensen, T. R., Ciais, P., Crosby, B. T., Czimczik, C. I., Grosse, G., Harden, J., Hayes, D. J.,  
 1136 Hugelius, G., Jastrow, J. D., Jones, J. B., Kleinen, T., Koven, C. D., Krinner, G., Kuhry, P., Lawrence, D. M.,  
 1137 McGuire, A. D., Natali, S. M., O'Donnell, J. A., Ping, C. L., Riley, W. J., Rinke, A., Romanovsky, V. E., Sannel,  
 1138 A. B. K., Schädel, C., Schaefer, K., Sky, J., Subin, Z. M., Tarnocai, C., Turetsky, M. R., Waldrop, M. P.,  
 1139 Walter Anthony, K. M., Wickland, K. P., Wilson, C. J., and Zimov, S. A.: Expert assessment of vulnerability  
 1140 of permafrost carbon to climate change, Clim. Change, 119, 359–374, doi:10.1007/s10584-013-0730-7,  
 1141 2013.

1142 Schuur, E. A. G., McGuire, A. D., Grosse, G., Harden, J. W., Hayes, D. J., Hugelius, G., Koven, C. D., and  
 1143 Kuhry, P.: Climate change and the permafrost carbon feedback, Nature, 520, 171–179,  
 1144 doi:10.1038/nature14338, 2015.

1145 Segal, R. A., Lantz, T. C., and Kokelj, S. V: Acceleration of thaw slump activity in glaciated landscapes of  
 1146 the Western Canadian Arctic, Environ. Res. Lett., 11, 34025, doi:10.1088/1748-9326/11/3/034025, 2016.

1147 Spencer, R. G. M., Mann, P. J., Dittmar, T., Eglinton, T. I., McIntyre, C., Holmes, R. M., Zimov, N., and  
 1148 Stubbins, A.: Detecting the signature of permafrost thaw in Arctic rivers, Geophys. Res. Lett., 42,  
 1149 doi:10.1002/2015GL063498, doi:10.1002/2015GL063498, 2015.

1150 Street, L. E., Dean, J. F., Billett, M. F., Baxter, R., Dinsmore, K. J., Lessels, J. S., Subke, J.-A., Tetzlaff, D.,  
 1151 and Wookey, P. A.: Redox dynamics in the active layer of an Arctic headwater catchment; examining the  
 1152 potential for transfer of dissolved methane from soils to stream water, J. Geophys. Res. Biogeosci., 121,  
 1153 2776–2792, doi: 10.1002/2016JG003387, 2016.

1154 Striegl, R. G., Aiken, G. R., Dornblaser, M. M., Raymond, P. A., and Wickland, K. P.: A decrease in  
 1155 discharge-normalized DOC export by the Yukon River during summer through autumn, Geophys. Res.  
 1156 Lett., 32, 1–4, doi:10.1029/2005GL024413, 2005.

1157 Tank, S. E., Raymond, P. A., Striegl, R. G., McClelland, J. W., Holmes, R. M., Fiske, G. J., and Peterson, B.  
 1158 J.: A land-to-ocean perspective on the magnitude, source and implication of DIC flux from major Arctic  
 1159 rivers to the Arctic Ocean, Global Biogeochem. Cycles, 26, GB4018, doi:10.1029/2011GB004192, 2012a.

1160 Tank, S. E., Manizza, M., Holmes, R. M., McClelland, J. W., and Peterson, B. J.: The processing and impact  
 1161 of dissolved riverine nitrogen in the Arctic Ocean, Estuaries and Coasts, 35, 401–415,  
 1162 doi:10.1007/s12237-011-9417-3, 2012b.

1163 Tanski, G., Couture, N., Lantuit, H., Eulenburg, A., and Fritz, M.: Eroding permafrost coasts release low  
 1164 amounts of dissolved organic carbon (DOC) from ground ice into the nearshore zone of the Arctic Ocean,  
 1165 *Glob. Biogeochem. Cycles*, 30, 1054–1068, doi:10.1002/2015GB005337, 2016.

1166 Tanski, G., Lantuit, H., Ruttore, S., Knoblauch, C., Radosavljevic, B., Strauss, J., Wolter, J., Irrgang, A. M.,  
 1167 Ramage, J., and Fritz, M.: Transformation of terrestrial organic matter along thermokarst-affected  
 1168 permafrost coasts in the Arctic. *Sci. Total Environ.* 581–582, 434–447, doi:  
 1169 10.1016/j.scitotenv.2016.12.152, 2017.

1170 Thompson, M. S., Prowse, T. D., Kokelj, S. V., and Wrona, F. J.: The impact of sediments derived from  
 1171 thawing permafrost on tundra lake water chemistry: An experimental approach, *Proc. Ninth Int. Conf.*  
 1172 *Permafr.*, 29, 1763–1768, 2008.

1173 Vonk, J. E. and Gustafsson, Ö.: Permafrost-carbon complexities, *Nat. Geosci.*, 6, 675–676,  
 1174 doi:10.1038/ngeo1937, 2013.

1175 Vonk, J. E., Mann, P. J., Dowdy, K. L., Davydova, A., Davydov, S. P., Zimov, N., Spencer, R. G. M., Bulygina,  
 1176 E. B., Eglinton, T. I., and Holmes, R. M.: Dissolved organic carbon loss from Yedoma permafrost amplified  
 1177 by ice wedge thaw, *Environ. Res. Lett.*, 8, 35023, doi:10.1088/1748-9326/8/3/035023, 2013a.

1178 Vonk, J. E., Mann, P. J., Davydov, S., Davydova, A., Spencer, R. G. M., Schade, J., Sobczak, W. V., Zimov,  
 1179 N., Zimov, S., Bulygina, E., Eglinton, T. I., and Holmes, R. M.: High biolability of ancient permafrost carbon  
 1180 upon thaw, *Geophys. Res. Lett.*, 40, 2689–2693, doi:10.1002/grl.50348, 2013b.

1181 Vonk, J. E., Tank, S. E., Mann, P. J., Spencer, R. G. M., Treat, C. C., Striegl, R. G., Abbott, B. W., and  
 1182 Wickland, K. P.: Biodegradability of dissolved organic carbon in permafrost soils and waterways: a meta-  
 1183 analysis, *Biogeosciences*, 12, 6915–6930, doi:10.5194/bgd-12-8353-2015, 2015a.

1184 Vonk, J. E., Tank, S. E., Bowden, W. B., Laurion, I., Vincent, W. F., Alekseychik, P., Amyot, M., Billet, M. F.,  
 1185 Canário, J., Cory, R. M., Deshpande, B. N., Helbig, M., Jammot, M., Karlsson, J., Larouche, J., Macmillan,  
 1186 G., Rautio, M., Walter Anthony, K. M., and Wickland, K. P.: Reviews and syntheses: Effects of permafrost  
 1187 thaw on Arctic aquatic ecosystems, *Biogeosciences*, 12, 7129–7167, doi:10.5194/bg-12-7129-2015,  
 1188 2015b.

1189 Ward, R. C. and Robinson, M.: Principles of Hydrology, Fourth Edition, McGraw-Hill International (UK)  
 1190 Limited., 2000.

1191 Watanabe, S., Laurion, I., Chokmani, K., Pienitz, R., and Vincent, W. F.: Optical diversity of thaw ponds in  
 1192 discontinuous permafrost: A model system for water color analysis, *J. Geophys. Res. Biogeosciences*,  
 1193 116, doi:10.1029/2010JG001380, 2011.

1194 Weishaar, J. and Aiken, G.: Evaluation of specific ultra-violet absorbance as an indicator of the chemical  
 1195 content of dissolved organic carbon, *Environ. Chem.*, 37, 4702–4708, doi:10.1021/es030360x, 2003.

1196 Woods, G. C., Simpson, M. J., Pautler, B. G., Lamoureux, S. F., Lafrenière, M. J., and Simpson, A. J.:  
 1197 Evidence for the enhanced lability of dissolved organic matter following permafrost slope disturbance in  
 1198 the Canadian High Arctic, *Geochim. Cosmochim. Acta*, 75, 7226–7241, doi:10.1016/j.gca.2011.08.013,  
 1199 2011.

1200 Yanagihara, Y., Koike, T., Matsuura, Y., Mori, S., Shibata, H., Satoh, F., Masuyagina, O., Zyryanova, O.,  
 1201 Prokushkin, A. S., Prokushkin, S. G., and Abaimov, A. P.: Soil respiration on the contrasting north- and  
 1202 south-facing slopes of a larch forests in Central Siberia, *Eurasian J. For. Res.*, 1, 19–29, 2000.

**Deleted:** Walsh, J. E., Overland, J. E., Groisman, P. Y. and Rudolf, B.: Snow, Water, Ice and Permafrost in the Arctic (SWIPA): Climate change and the cryosphere, Arctic Monitoring and Assessment Programme (AMAP), Oslo, Norway., 2011.¶

1207 Zeileis, A. and Grothendieck, G.: zoo: S3 infrastructure for regular and irregular time series, *J. Stat.*  
1208 *Softw.*, 14, 1–27, 2005.

1209 Zeileis, A. and Hothorn, T.: Diagnostic checking in regression relationships., *R News*, 2, 7–10, 2002.

1210 Zhou, Y., Guo, H., Lu, H., Mao, R., Zheng, H., and Wang, J.: Analytical methods and application of stable  
1211 isotopes in dissolved organic carbon and inorganic carbon in groundwater, *Rapid Commun. Mass*  
1212 *Spectrom.*, 29, 1827–1835, doi:10.1002/rcm.7280, 2015.

1213 Zuur, A. F., Ieno, E. N., Walker, N., Saveliev, A. A., and Smith, G. M.: *Mixed Effects Models and Extensions*  
1214 *in Ecology with R*, Springer, New York., 2009.

1215

**Table 1:** Slump characteristics and sampling information for eight retrogressive thaw slumps sampled during the 2014 field season on the Peel Plateau, NWT, Canada. Characteristics are derived from published values and field estimations.

| Slump location  | Sample dates (Julian day) <sup>a</sup> | Latitude  | Longitude   | Area (ha)               | Debris tongue (m) <sup>b</sup> | Headwall height (m)   |
|-----------------|----------------------------------------|-----------|-------------|-------------------------|--------------------------------|-----------------------|
| FM4             | 202, 210, 223                          | 67 16.679 | -135 09.573 | 8.8                     | 960                            | 16 to 20 <sup>d</sup> |
| FM2             | 200, 209, 222                          | 67 15.462 | -135 14.216 | 31.7                    | 1529                           | 25 <sup>e</sup>       |
| FM3             | 197, 212                               | 67 15.100 | -135 16.270 | 6.1                     | 576                            | 10 <sup>e</sup>       |
| SD              | 196, 213, 234                          | 67 10.818 | -135 43.630 | 3.3                     | NA                             | 2 – 4 <sup>d</sup>    |
| HA              | 190, 229                               | 67 09.057 | -135 41.121 | 5.9                     | 288                            | 6 – 10 <sup>d</sup>   |
| HB              | 190, 229                               | 67 14.397 | -135 49.167 | 13.6 <sup>c</sup>       | 257                            | 6 – 10 <sup>d</sup>   |
| HC              | 190, 229                               | 67 19.652 | -135 53.620 | 10.3, 10.3 <sup>c</sup> | 408                            | 6 – 10 <sup>d</sup>   |
| HD              | 190, 229                               | 67 24.025 | -135 20.048 | 1.8                     | 137                            | 6 – 10 <sup>d</sup>   |
| Weather Station |                                        | 67 14.756 | -135 12.920 |                         |                                |                       |

<sup>a</sup> Excludes samples for the FM3 'environmental controls' analysis which was conducted on 17 additional dates; HD, Julian date 229 did not include a within-slump sample.

<sup>b</sup> The length of debris tongue measured from the base of the debris scar, along the valley bottom stream

<sup>c</sup> Site HB is comprised of two smaller slump features that have merged into the scar zone delineated

here; site HC is comprised of 5 separate slump features that have merged into two scar zones, each with an area of 10.3 ha

<sup>d</sup> Rough estimates by field crews over 2014 and 2015 field seasons

<sup>e</sup> (Kokelj et al., 2015)

1231 **Table 2:** Results of the mixed-effects models used to assess the effects of slumping on stream water  
1232 chemistry and optical characteristics. Downstream models incorporated data from downstream and  
1233 upstream sites; within-slump models incorporated data from within-slump and upstream sites. Provided  
1234 are degrees of freedom (df), t-statistics, and p-values for individual model runs. Further details on the  
1235 statistical approach are provided in Section 3.4.  
1236

|                  | Downstream |         |        | Within-slump |         |       |
|------------------|------------|---------|--------|--------------|---------|-------|
|                  | df         | t       | p      | df           | t       | p     |
| DOC              | 20         | -12.895 | <.0001 | 30           | -1.468  | 0.153 |
| Na               | 33         | 9.662   | <.0001 | 30           | 7.278   | 0.000 |
| Ca               | 33         | 9.767   | <.0001 | 30           | 4.782   | 0.000 |
| Mg               | 33         | 6.166   | <.0001 | 30           | 8.593   | 0.000 |
| Conductivity     | 32         | 43.083  | <.0001 | 30           | 11.895  | 0.000 |
| TSS              | 29         | 6.692   | <.0001 | 28           | 2.187   | 0.037 |
| SUVA             | 31         | -5.296  | <.0001 | 30           | -35.052 | 0.000 |
| S <sub>R</sub>   | 31         | 5.092   | <.0001 | 31           | 8.065   | 0.000 |
| S <sub>275</sub> | 30         | 2.695   | 0.011  | 31           | 8.159   | 0.000 |
| S <sub>350</sub> | 31         | -3.595  | 0.001  | 31           | 16.665  | 0.000 |

1237

1238

1239 **Table 3:** Measured fraction modern carbon ( $F^{14}C$ ) and estimated calendar years before present for  $^{14}C$  of  
1240 dissolved organic carbon samples collected upstream of, and within drainage waters of, selected slump  
1241 sites. Data were collected during the summer of 2016. nc indicates sample not collected. Error  
1242 estimates indicate 1 $\sigma$ .

| Site | $F^{14}C$           |                     | $^{14}C$ yr BP |               |
|------|---------------------|---------------------|----------------|---------------|
|      | Upstream            | Within-slump        | Upstream       | Within-slump  |
| FM4  | $0.9734 \pm 0.0029$ | nc                  | $217 \pm 24$   | nc            |
| FM2  | $0.9764 \pm 0.0032$ | $0.3030 \pm 0.0024$ | $192 \pm 27$   | $9592 \pm 64$ |
| FM3  | $1.0023 \pm 0.0030$ | $0.3618 \pm 0.0018$ | modern         | $8167 \pm 39$ |
| SD   | $1.0216 \pm 0.0035$ | $0.8659 \pm 0.0025$ | modern         | $1157 \pm 23$ |

1244

1245 **Table 4:** Results of multiple linear regression analyses to assess environmental controls on upstream and downstream DOC flux, and upstream  
 1246 and downstream DOC concentration. nr indicates variables that were not retained in the best fit regression model; NA indicates variables that  
 1247 were not run in individual analyses. Significant p-values are indicated with bold text; marginal results ( $0.05 < p < 0.10$ ) are indicated in italics.  
 1248 Model statistics are as follows: downstream flux  $r^2=0.84$ ,  $F_{7,11}=8.25$ ,  $p = 0.001$ ; upstream flux  $r^2=0.87$ ,  $F_{7,11}=10.79$ ,  $p < 0.001$ ; downstream  
 1249 concentration  $r^2=0.85$ ,  $F_{4,14}=19.57$ ,  $p < 0.001$ ; upstream concentration  $r^2=0.91$ ,  $F_{5,13}=27.05$ ,  $p < 0.001$ .

| Coefficient                                         | Downstream DOC flux |               |                  | Upstream DOC flux |               |                  | Downstream DOC concentration |               |                  | Upstream DOC concentration |               |                  |
|-----------------------------------------------------|---------------------|---------------|------------------|-------------------|---------------|------------------|------------------------------|---------------|------------------|----------------------------|---------------|------------------|
|                                                     | Estimate            | t             | p                | Estimate          | t             | p                | Estimate                     | t             | p                | Estimate                   | t             | p                |
| <b>Average Air Temperature (°C)</b>                 |                     |               |                  |                   |               |                  |                              |               |                  |                            |               |                  |
| 0 h                                                 | -67.08              | -1.685        | 0.120            | <b>-115.96</b>    | <b>-3.286</b> | <b>0.007</b>     | nr                           | nr            | nr               | <b>0.165</b>               | <b>2.349</b>  | <b>0.035</b>     |
| 48 h                                                | nr                  | nr            | nr               | 56.32             | 1.534         | 0.153            | <b>0.332</b>                 | <b>6.886</b>  | <b>&lt;0.001</b> | <b>0.396</b>               | <b>5.510</b>  | <b>&lt;0.001</b> |
| 72 h                                                | <b>-95.15</b>       | <b>-2.594</b> | <b>0.025</b>     | <b>-94.17</b>     | <b>-2.717</b> | <b>0.020</b>     | nr                           | nr            | nr               | nr                         | nr            | nr               |
| 120 h                                               | nr                  | nr            | nr               | nr                | nr            | nr               | <b>0.134</b>                 | <b>3.527</b>  | <b>0.003</b>     | <b>0.203</b>               | <b>4.411</b>  | <b>&lt;0.001</b> |
| <b>Rainfall (mm)</b>                                |                     |               |                  |                   |               |                  |                              |               |                  |                            |               |                  |
| 0h                                                  | <b>116.13</b>       | <b>5.411</b>  | <b>&lt;0.001</b> | <b>105.47</b>     | <b>6.039</b>  | <b>&lt;0.001</b> | <i>-0.066</i>                | <i>-1.967</i> | <i>0.069</i>     | nr                         | nr            | nr               |
| 48h                                                 | nr                  | nr            | nr               | nr                | nr            | nr               | nr                           | nr            | nr               | nr                         | nr            | nr               |
| 72h                                                 | nr                  | nr            | nr               | nr                | nr            | nr               | nr                           | nr            | nr               | nr                         | nr            | nr               |
| 120h                                                | <i>-23.94</i>       | <i>-1.970</i> | <i>0.075</i>     | <b>-24.15</b>     | <b>-2.529</b> | <b>0.028</b>     | nr                           | nr            | nr               | nr                         | nr            | nr               |
| <b>Average net radiation (W m<sup>-2</sup>)</b>     |                     |               |                  |                   |               |                  |                              |               |                  |                            |               |                  |
| 0h                                                  | 4.96                | 1.286         | 0.225            | nr                | nr            | nr               | <b>-0.021</b>                | <b>-4.043</b> | <b>0.001</b>     | <b>-0.021</b>              | <b>-3.387</b> | <b>0.005</b>     |
| 48h                                                 | nr                  | nr            | nr               | nr                | nr            | nr               | nr                           | nr            | nr               | nr                         | nr            | nr               |
| 72h                                                 | 5.58                | 1.545         | 0.151            | 4.04              | 1.563         | 0.146            | nr                           | nr            | nr               | nr                         | nr            | nr               |
| 120h                                                | nr                  | nr            | nr               | nr                | nr            | nr               | nr                           | nr            | nr               | nr                         | nr            | nr               |
| <b>Total suspended sediment (mg L<sup>-1</sup>)</b> |                     |               |                  |                   |               |                  |                              |               |                  |                            |               |                  |
| Downstream                                          | <i>-0.02</i>        | <i>-2.102</i> | <i>0.059</i>     | NA                | NA            | NA               | nr                           | nr            | nr               | NA                         | NA            | NA               |
| Upstream                                            | NA                  | NA            | NA               | -0.32             | -1.626        | 0.132            | NA                           | NA            | NA               | -0.0006                    | -1.627        | 0.128            |



1250 **Figure captions:**

1251 **Fig. 1:** Location and morphology of thaw slumps on the Peel Plateau, Northwest Territories, Canada.

1252 Panel A depicts the stream networks and location of the eight retrogressive thaw slumps studied. Panel  
1253 B depicts representative sampling locations at each slump site; FM3 depicted. Panels C-E depict  
1254 representative thaw-slump headwall stratigraphies. Panel C shows a mega-slump (FM3, the smallest  
1255 mega-slump, is depicted); panel D shows a moderate-sized slump (HB); panel E shows the smallest  
1256 slump that was sampled (SD). In panels C and D, the approximate location of the modern active layer (a),  
1257 early Holocene-aged relict active layer (b), and Pleistocene-aged glacialic materials (c) is shown.

**Deleted:** on the Peel Plateau, Northwest Territories, Canada

1258 **Fig. 2:** The effect of retrogressive thaw slumps on stream water dissolved organic carbon (DOC)  
1259 concentration. Each data point represents the mean and standard error of measurements across all  
1260 sampling dates, as described in Table 1. The bottom two panels show the ratio of within-slump:  
1261 upstream, and downstream: upstream DOC concentrations within individual slumps, with points  
1262 indicating the mean and standard error of this ratio across sample dates.

1263 **Fig. 3:** Box and whisker plots to illustrate the effects of retrogressive thaw slump activity on stream  
1264 geochemistry. Each boxplot includes data from across all slumps and sampling periods, and indicates  
1265 median values, 25<sup>th</sup> and 75<sup>th</sup> percentiles (box extremities), 10<sup>th</sup> and 90<sup>th</sup> percentiles (whiskers), and  
1266 outlier points. U=upstream sites; W=within-slump sites; D=downstream sites.

1267 **Fig. 4:** The effect of retrogressive thaw slumps on the optical properties of stream water dissolved  
1268 organic matter. Each data point represents the mean and standard error of measurements across all  
1269 sampling dates, as described in Table 1. Shown are specific UV absorbance (SUVA<sub>254</sub>), spectral slopes  
1270 between 275-295 and 350-400 nm (S<sub>275-295</sub>; S<sub>350-400</sub>) and the slope ratio (S<sub>R</sub>).

**Formatted:** Subscript

**Formatted:** Subscript

**Formatted:** Subscript

**Formatted:** Subscript

1271 **Fig. 5:** Paired oxygen isotopic ( $\delta^{18}\text{O}$  ‰) and SUVA<sub>254</sub> (L mg C<sup>-1</sup>m<sup>-1</sup>) data, to demonstrate the relationship  
1272 between source water age and dissolved organic matter composition. Reference  $\delta^{18}\text{O}$  values are from  
1273 Lacelle et al. (2013): the modern active layer value is derived from active layer pore water in this region,  
1274 icy diamicton has been sourced as Holocene in origin, and the  $\delta^{18}\text{O}$  value for Pleistocene-aged ground ice  
1275 is the most positive value for this region.

**Deleted:** s

**Deleted:** is equivalent of the meteoric water line

**Formatted:** Not Highlight

**Deleted:** is

**Deleted:** been aged to be

**Deleted:** era

**Deleted:** enriched

**Deleted:** Pleistocene-aged

1276 **Fig. 6:** Environmental conditions (solar radiation, precipitation and mean daily air temperature) and DOC  
1277 flux upstream and downstream of slump FM3 across a month-long sample period (July 12-August 12,  
1278 2014). Corresponding multiple linear regressions are described in Table 4.

1279 **Fig. 7:** Within-slump fluxes of dissolved organic carbon (DOC), and TSS, compared to the calculated  
1280 (downstream - upstream) fluxes for these two constituents. TSS – a conservative tracer over short  
1281 distances – shows an additive response where the measured within-slump flux is equivalent to the  
1282 calculated (downstream - upstream) flux. In contrast, DOC shows clear evidence of downstream loss.

1283  
1284

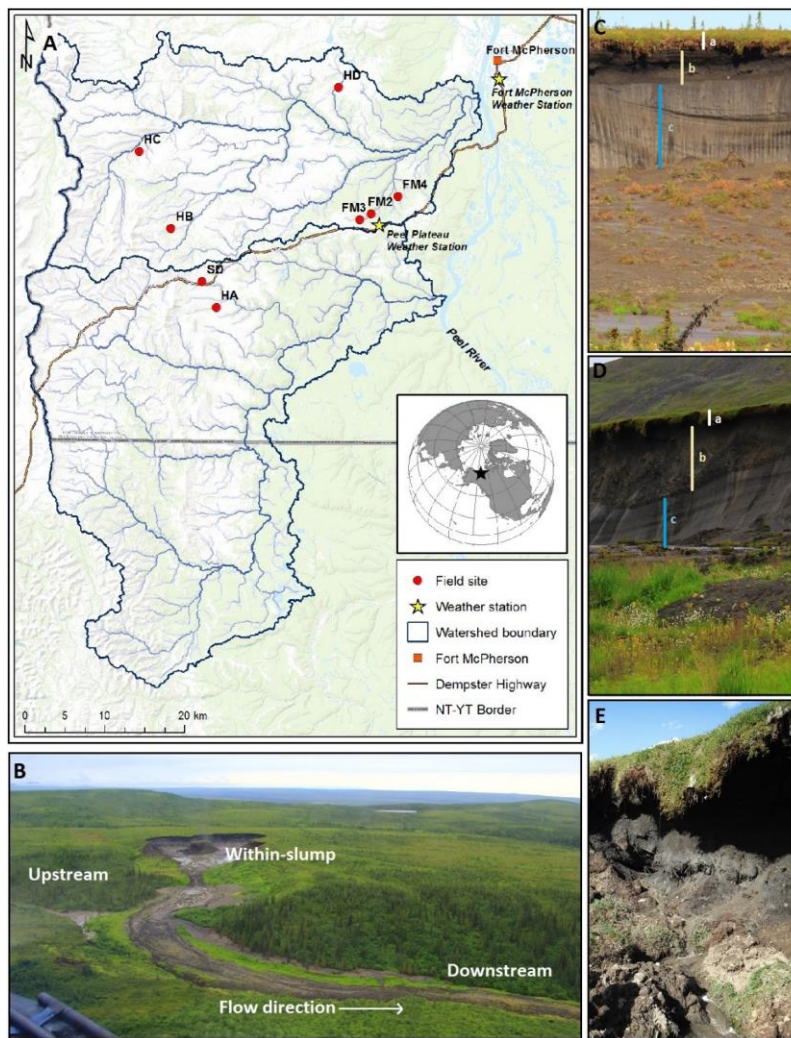

**Fig. 1:** Location and morphology of thaw slumps on the Peel Plateau, Northwest Territories, Canada. Panel A depicts the stream networks and location of the eight retrogressive thaw slumps studied. Panel B depicts representative sampling locations at each slump site; FM3 depicted. Panels C-E depict representative thaw-slump headwall stratigraphies. Panel C shows a mega-slump (FM3, the smallest mega-slump, is depicted); panel D shows a moderate-sized slump (HB); panel E shows the smallest slump that was sampled (SD). In panels C and D, the approximate location of the modern active layer (a), early Holocene-aged relict active layer (b), and Pleistocene-aged glacial materials (c) is shown.

1301

Deleted: Figure 1 ¶

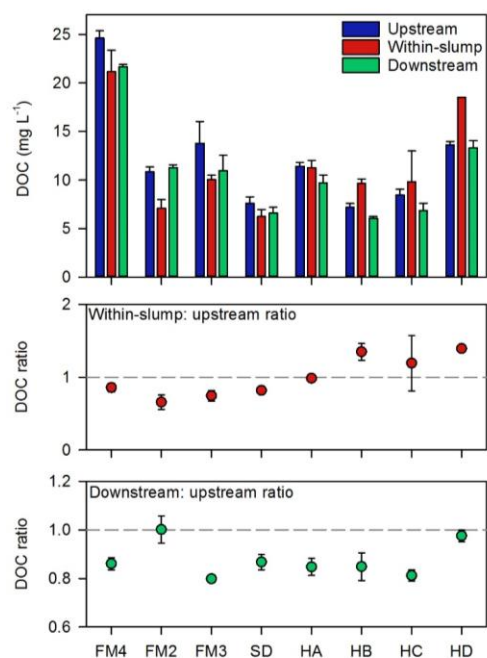

1302

1303 **Fig. 2:** The effect of retrogressive thaw slumps on stream water dissolved organic carbon (DOC)  
 1304 concentration. Each data point represents the mean and standard error of measurements across all  
 1305 sampling dates, as described in Table 1. The bottom two panels show the ratio of within-slump:  
 1306 upstream, and downstream: upstream DOC concentrations within individual slumps, with points  
 1307 indicating the mean and standard error of this ratio across sample dates.

1308

Deleted: Figure 2 ¶

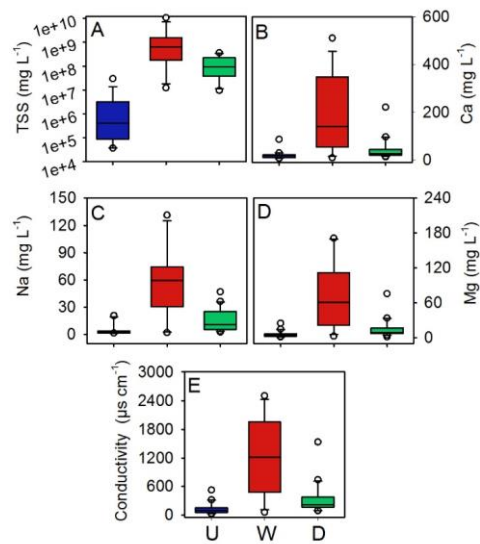

**Fig. 3:** Box and whisker plots to illustrate the effects of retrogressive thaw slump activity on stream geochemistry. Each boxplot includes data from across all slumps and sampling periods, and indicates median values, 25<sup>th</sup> and 75<sup>th</sup> percentiles (box extremities), 10<sup>th</sup> and 90<sup>th</sup> percentiles (whiskers), and outlier points. U=upstream sites; W=within-slump sites; D=downstream sites.

Deleted: Figure 3 ¶

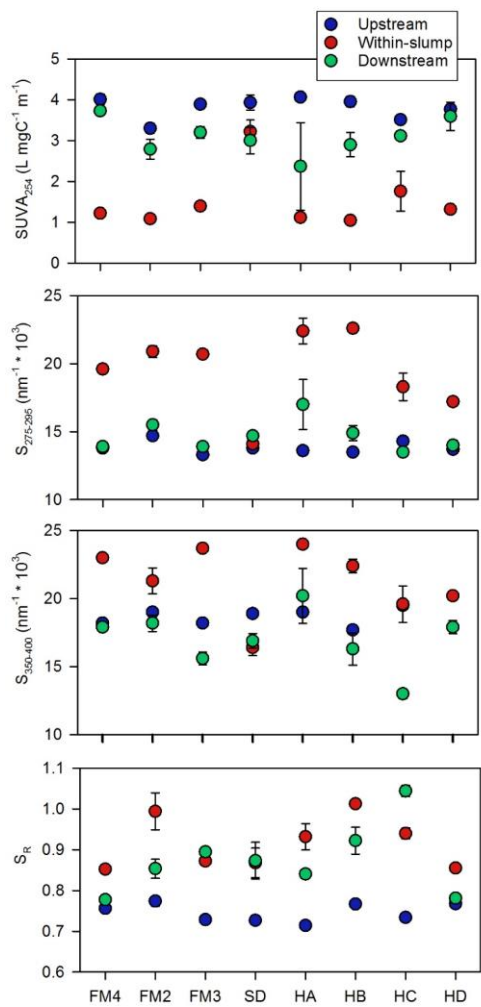

1319 **Fig. 4:** The effect of retrogressive thaw slumps on the optical properties of stream water dissolved  
1320 organic matter. Each data point represents the mean and standard error of measurements across all  
1321 sampling dates, as described in Table 1. Shown are specific UV absorbance ( $SUVA_{254}$ ), spectral slopes  
1322 between 275-295 and 350-400 nm ( $S_{275-295}$ ;  $S_{350-400}$ ) and the slope ratio ( $S_R$ ).

1323

Deleted: Figure 4 ¶

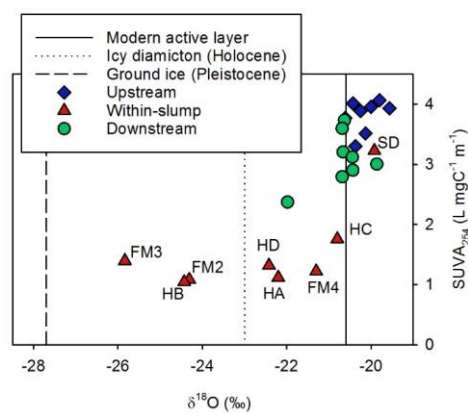

**Fig. 5:** Paired oxygen isotopic ( $\delta^{18}\text{O}$  ‰) and  $\text{SUVA}_{254}$  ( $\text{L mg C}^{-1}\text{m}^{-1}$ ) data, to demonstrate the relationship between source water age and dissolved organic matter composition. Reference  $\delta^{18}\text{O}$  values are from [Lacelle et al. \(2013\)](#): the modern active layer value is derived from active layer pore water in this region, icy diamicton has been sourced as Holocene in origin, and the  $\delta^{18}\text{O}$  value for Pleistocene-aged ground ice is the most positive value for this region.

Deleted: Figure 5 ¶

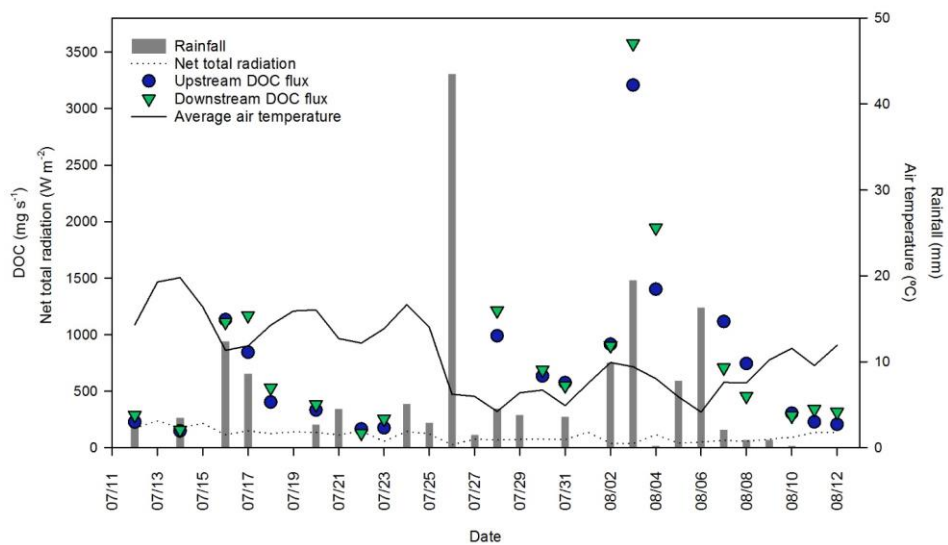

**Fig. 6:** Environmental conditions (solar radiation, precipitation and mean daily air temperature) and DOC flux upstream and downstream of slump FM3 across a month-long sample period (July 12-August 12, 2014). Corresponding multiple linear regressions are described in Table 4.

Deleted: Figure 6 ¶

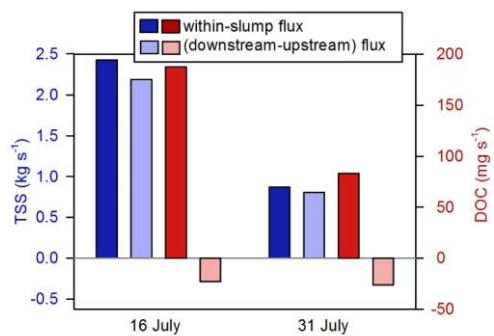

**Fig. 7:** Within-slump fluxes of dissolved organic carbon (DOC), and TSS, compared to the calculated (downstream - upstream) fluxes for these two constituents. TSS – a conservative tracer over short distances – shows an additive response where the measured within-slump flux is equivalent to the calculated (downstream - upstream) flux. In contrast, DOC shows clear evidence of downstream loss.

Deleted: Figure 7
